# Supplementary material for: Sulfated tungstate/dioxygen: a new catalytic system for oxysulfonylation of styrenes to form β-keto sulfones
Source: Royal Society of Chemistry journal article supplement (doi:10.1039/d0nj01763a), 2020-01-01
Supplement: d0nj01763a1.pdf [file d0nj01763a1.pdf]

**New journal of chemistry**

**SUPPORTING INFORMATION**

**Title: Sulfated tungstate/dioxygen: A new catalytic system for oxysulfonylation  
of styrenes to form  $\beta$ -keto sulfones**

Author(s): Ganesh Wagh, Snehalata Autade, Raghavendra V. Kulkarni and Krishnacharya G. Akamanchi\*

**Table of Contents 1.**

1.  $^1\text{H}$  NMR and  $^{13}\text{C}$  NMR spectra of **3a-3u**..... S 2-S 43

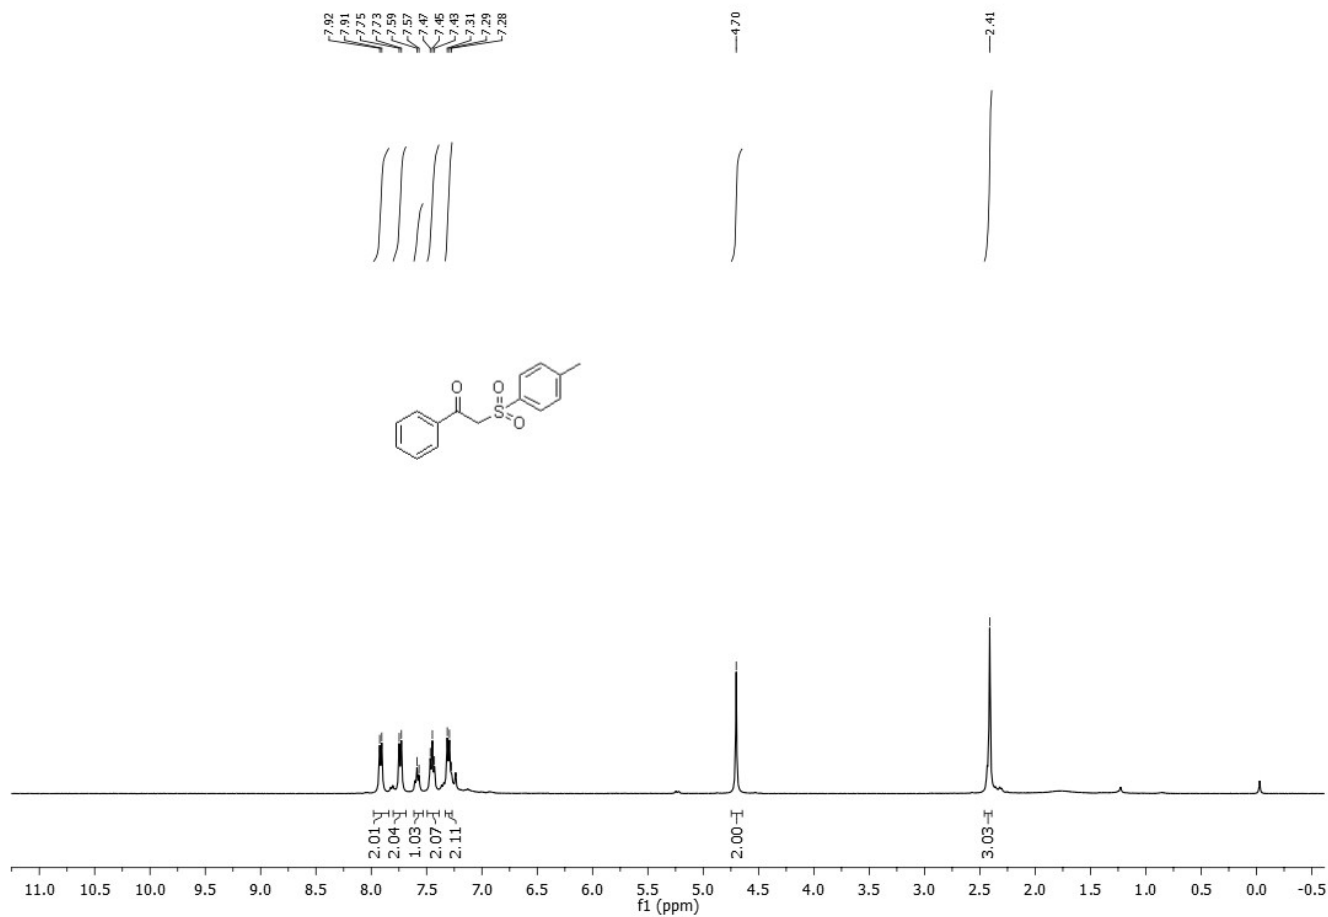

**<sup>1</sup>H spectrum 3a**

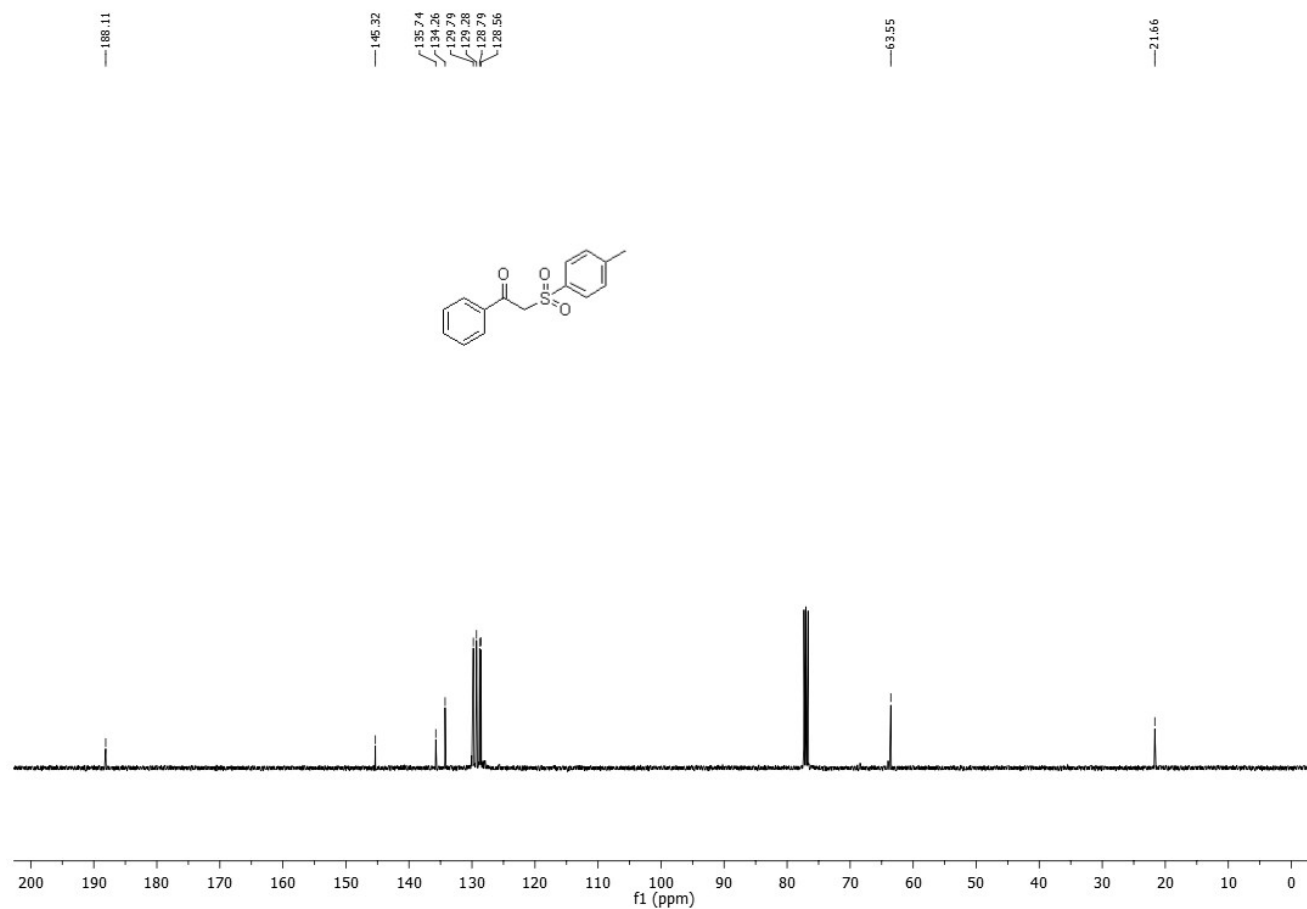

<sup>13</sup>C spectrum 3a

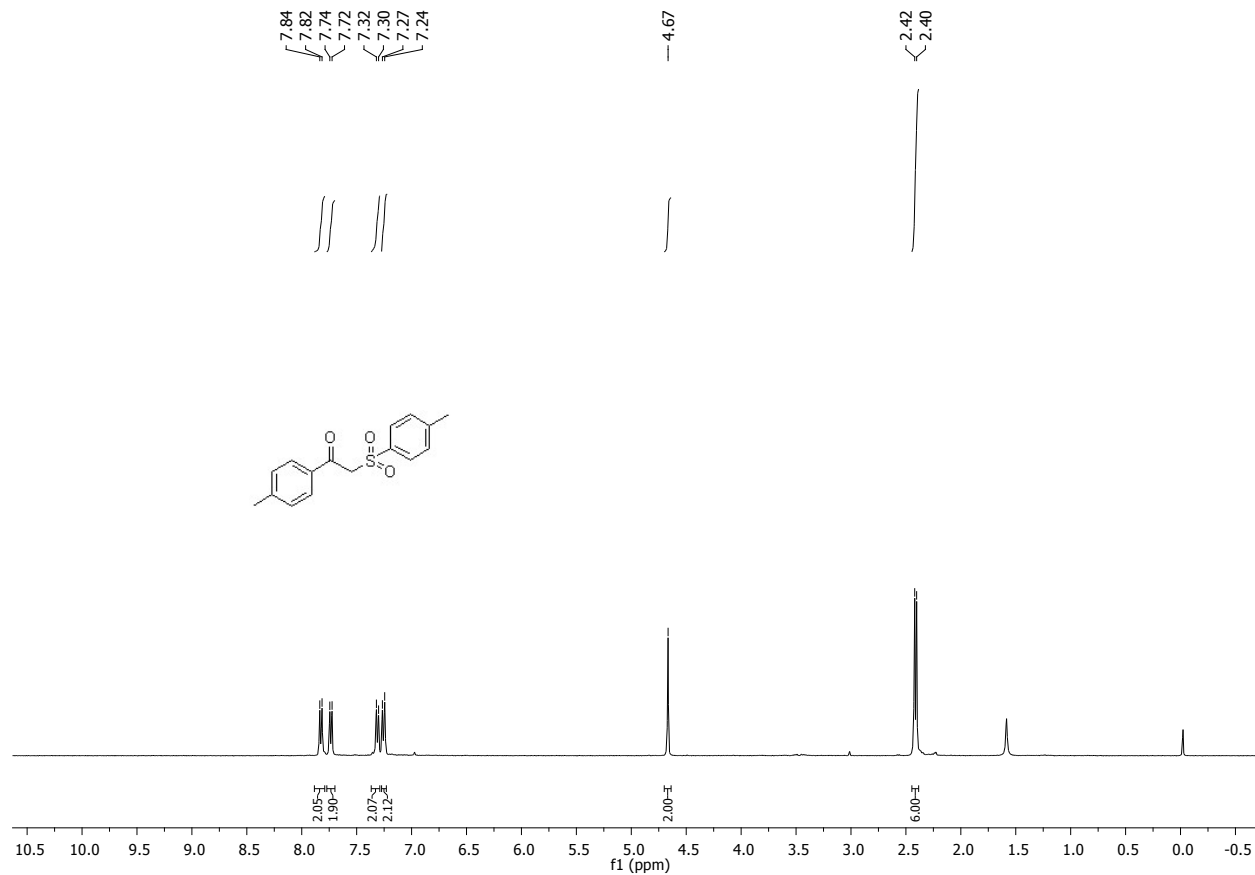

**<sup>1</sup>H spectrum 3b**

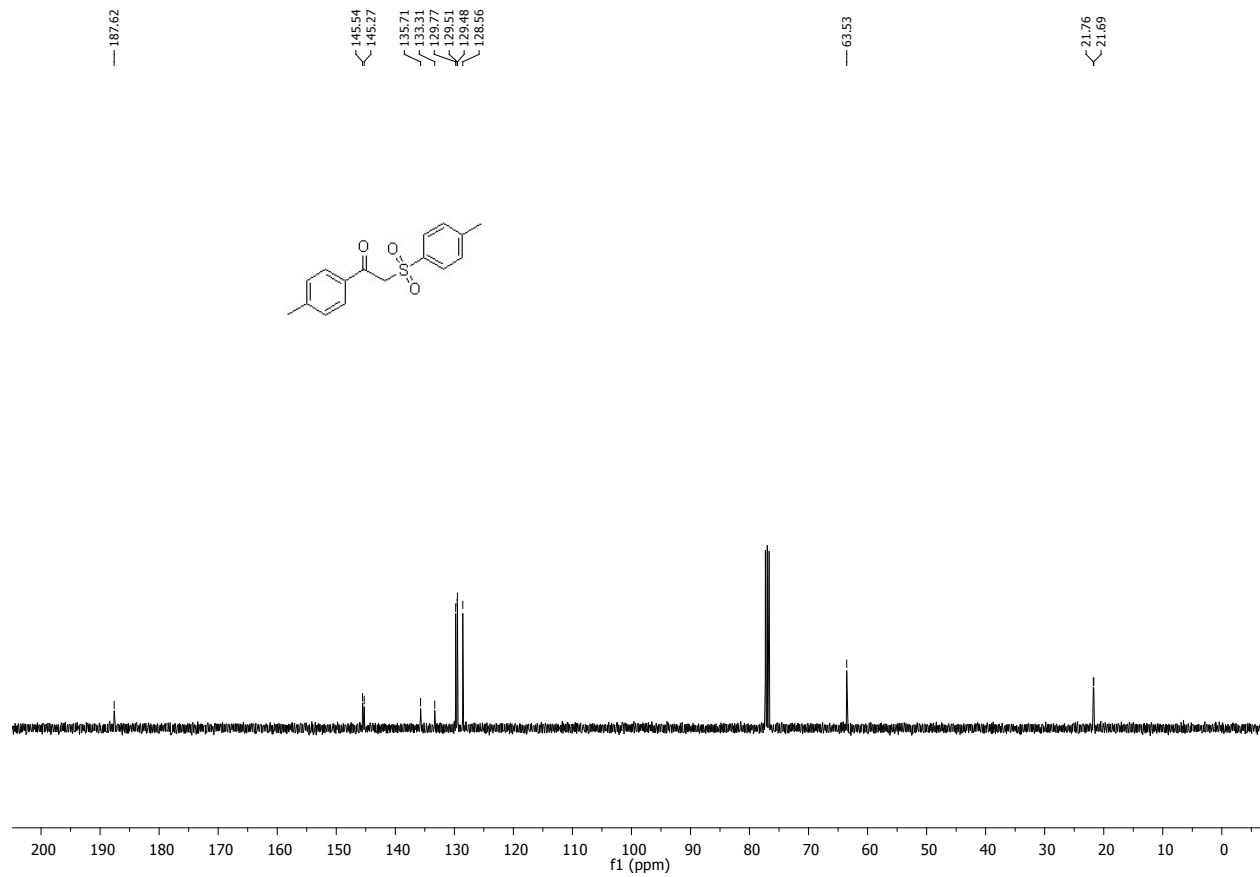

$^{13}\text{C}$  spectrum 3b

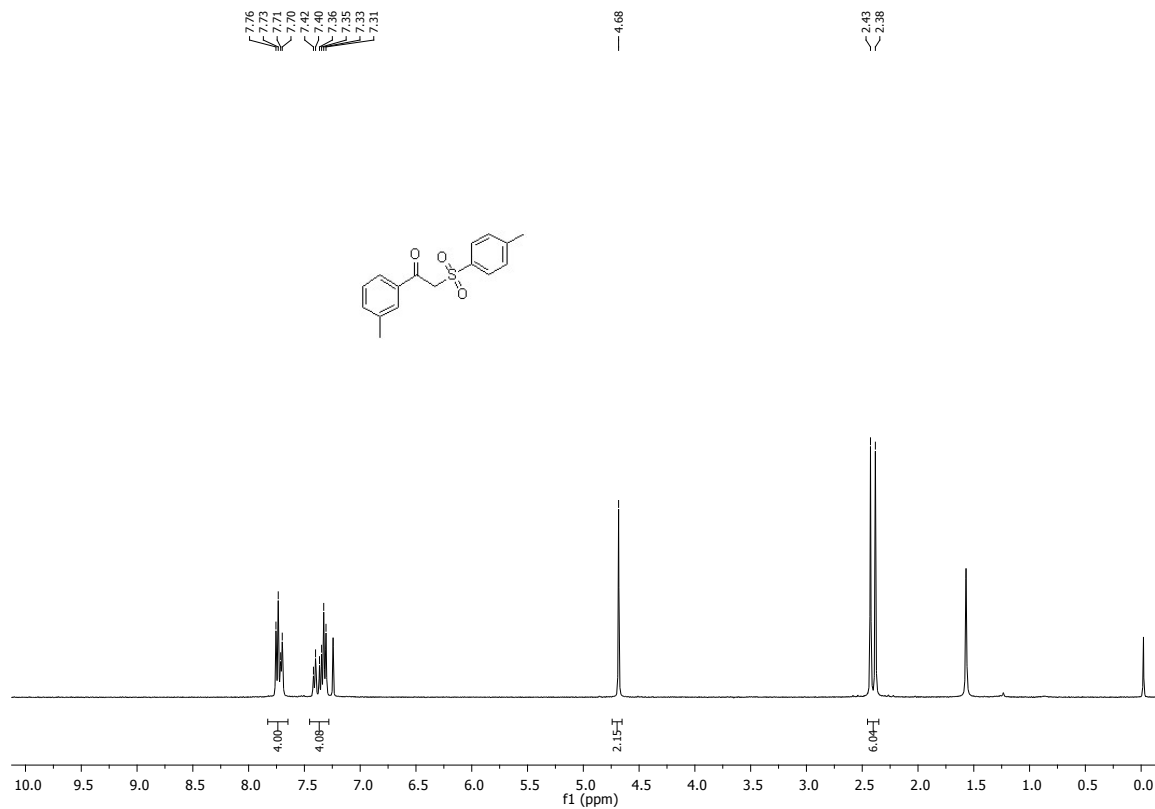

**<sup>1</sup>H spectrum 3c**

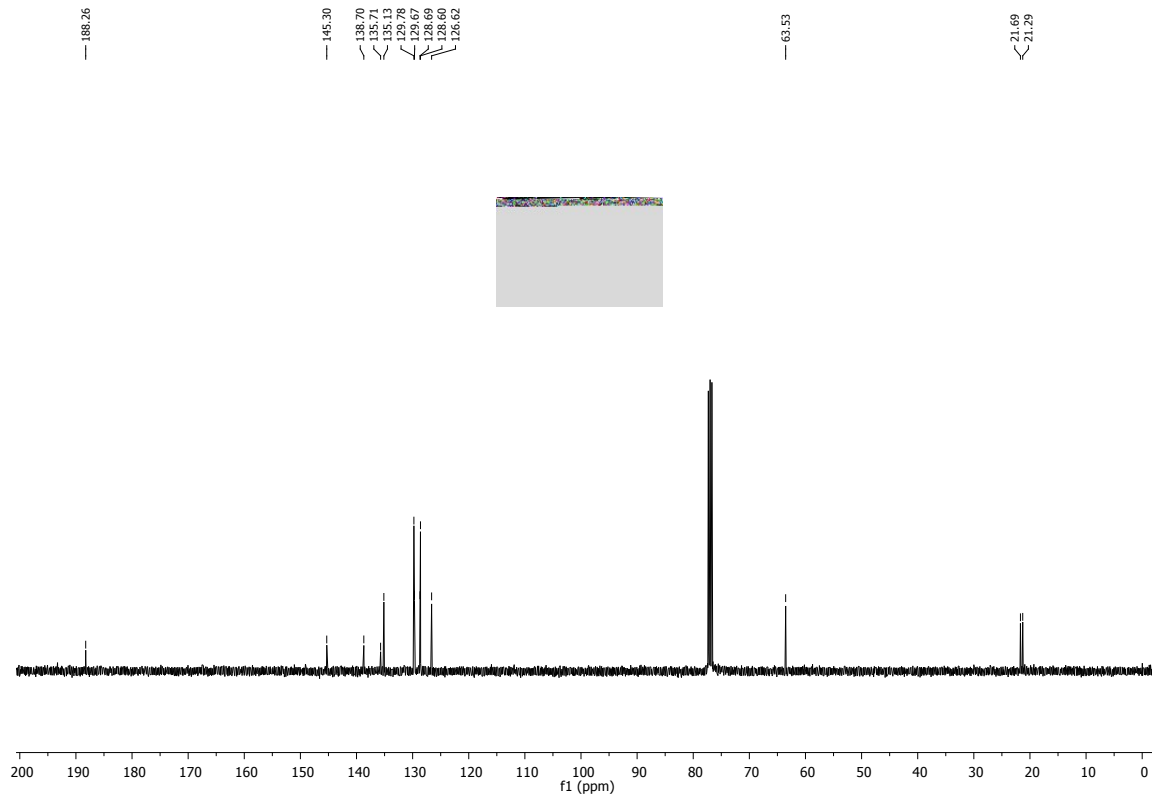

$^{13}\text{C}$  spectrum 3c

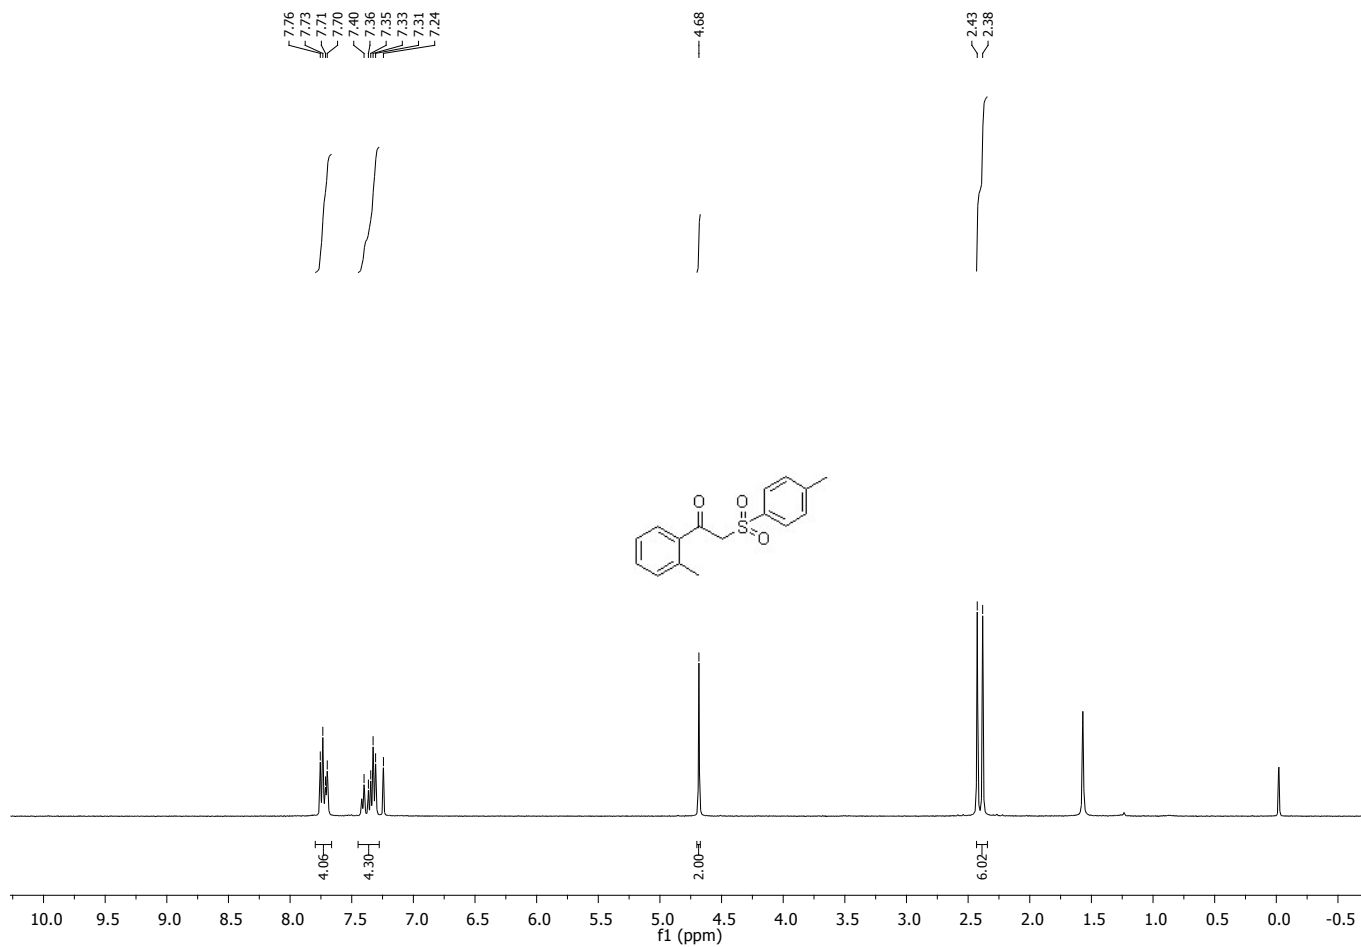

<sup>1</sup>H spectrum 3d



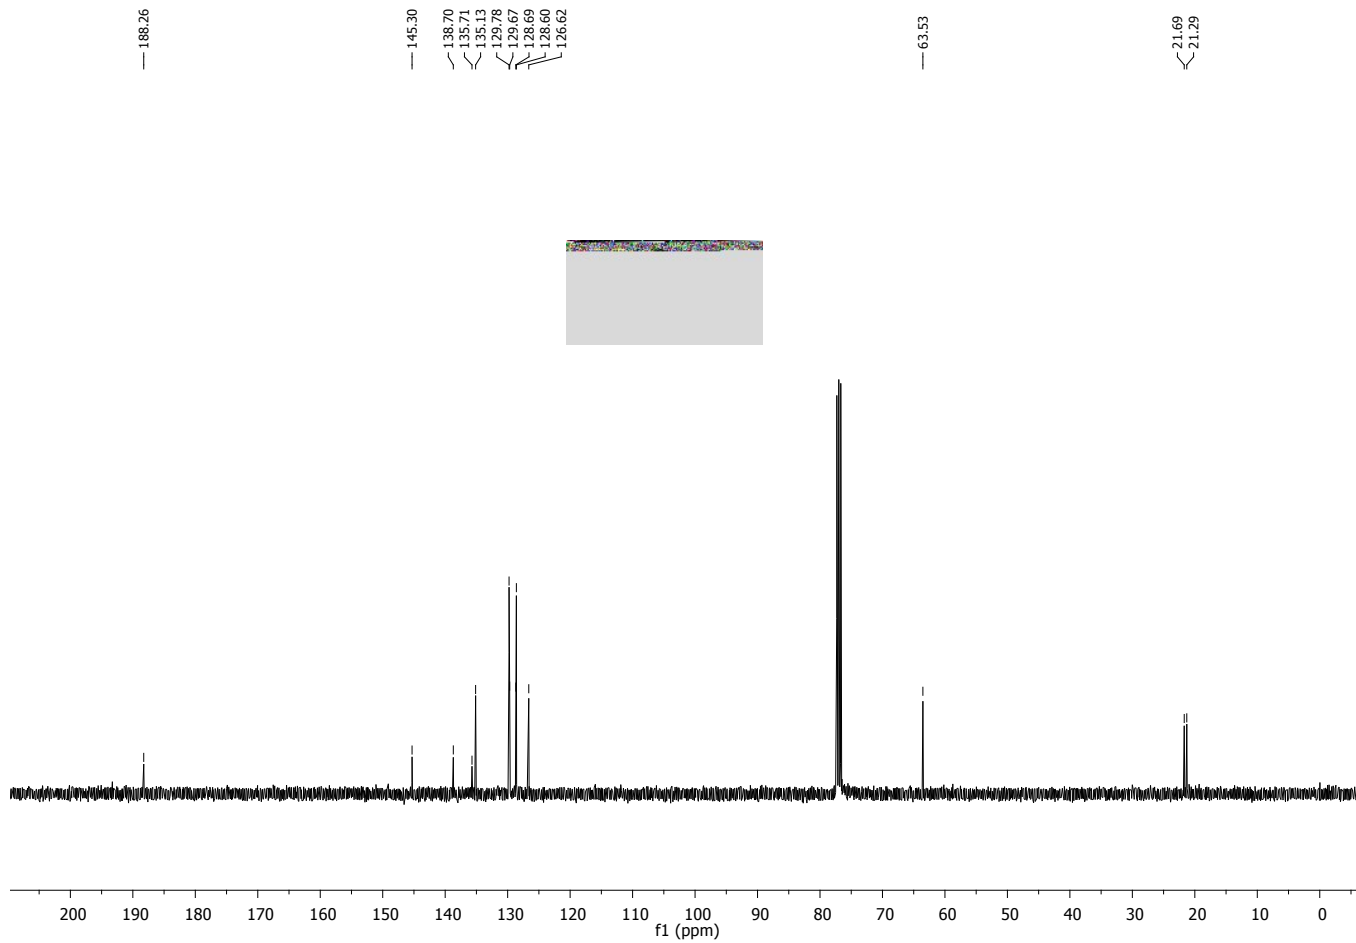

$^{13}\text{C}$  spectrum 3d

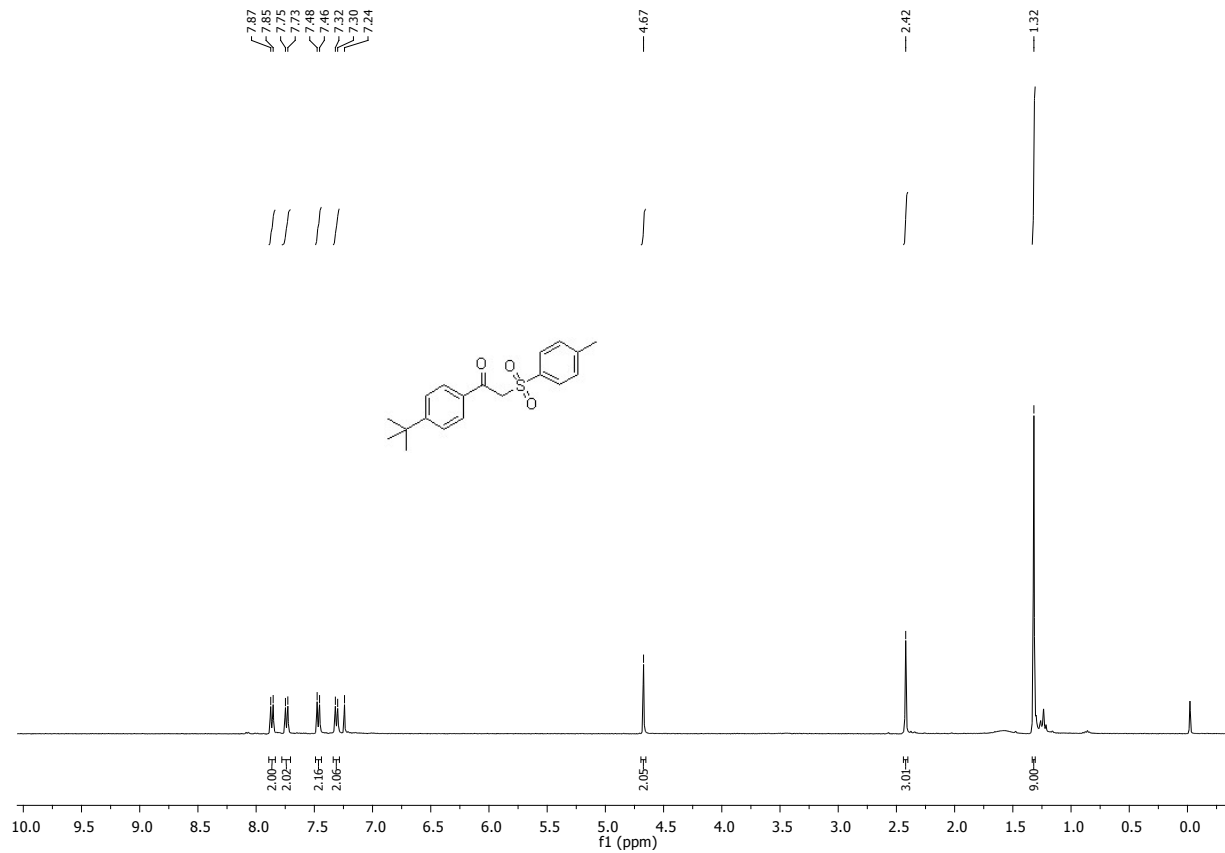

**<sup>1</sup>H spectrum 3e**

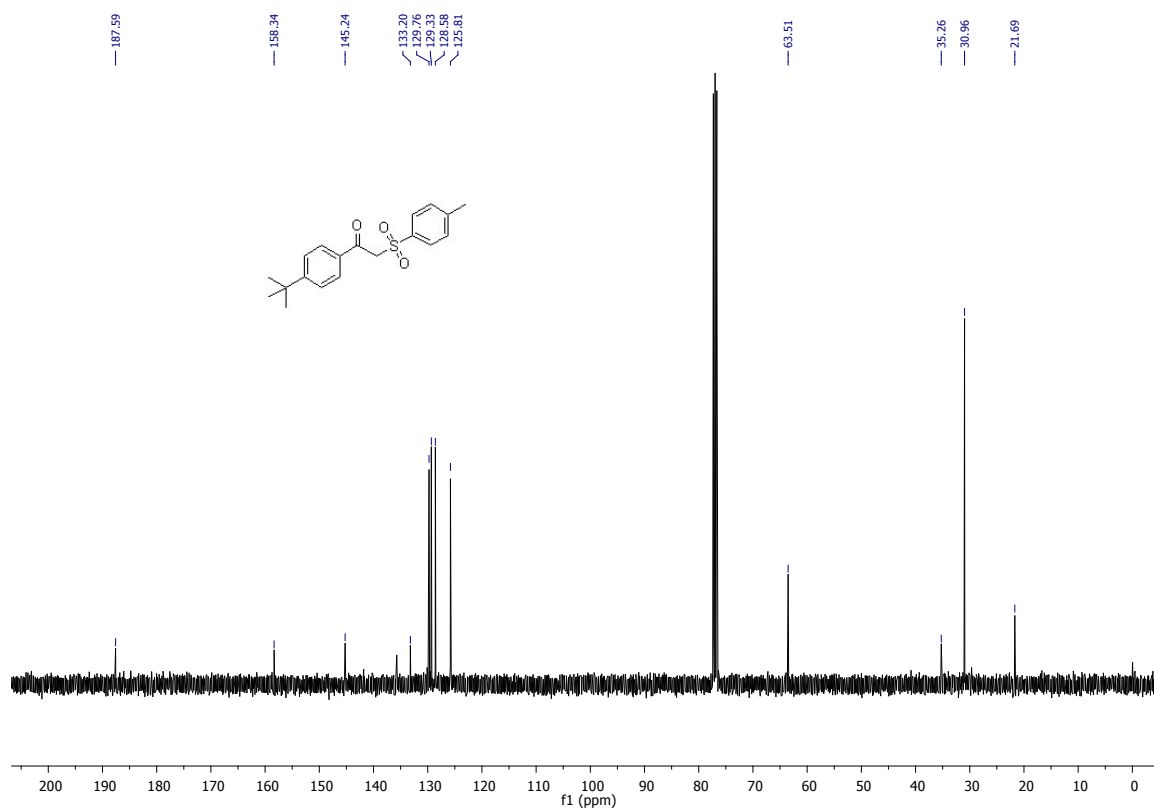

<sup>13</sup>C spectrum 3e

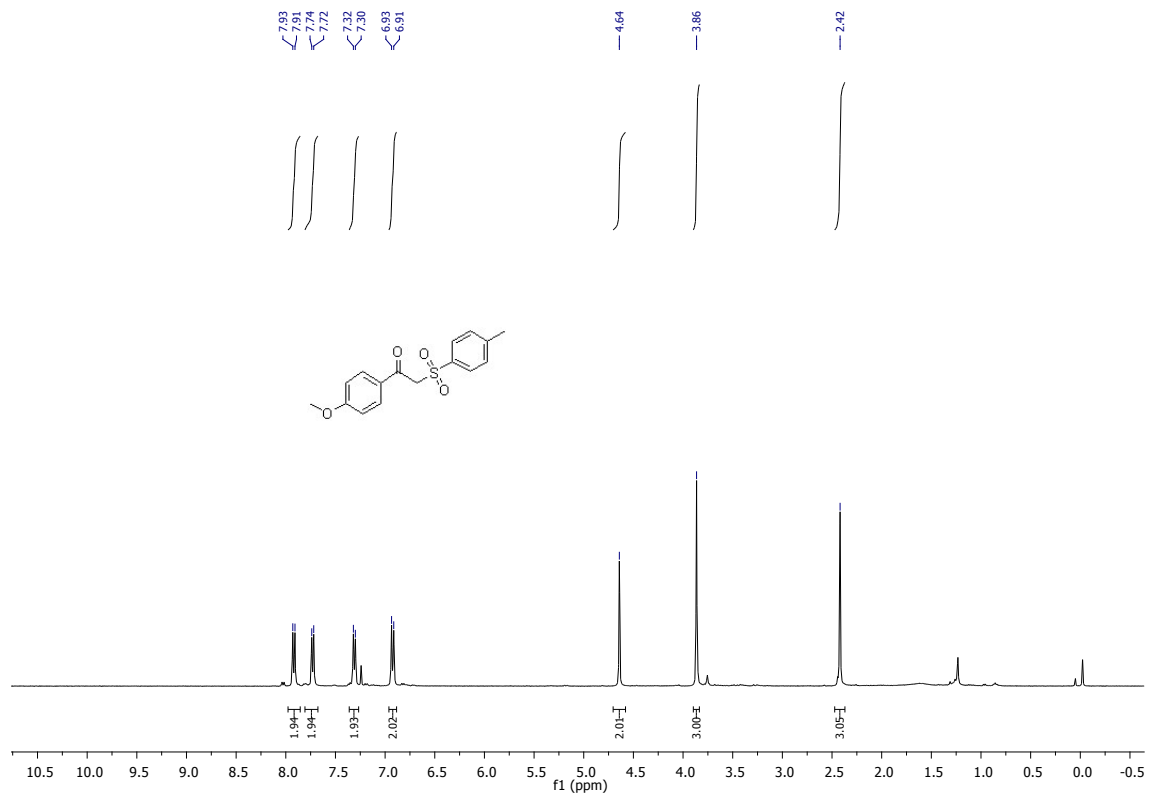

**<sup>1</sup>H spectrum 3f**

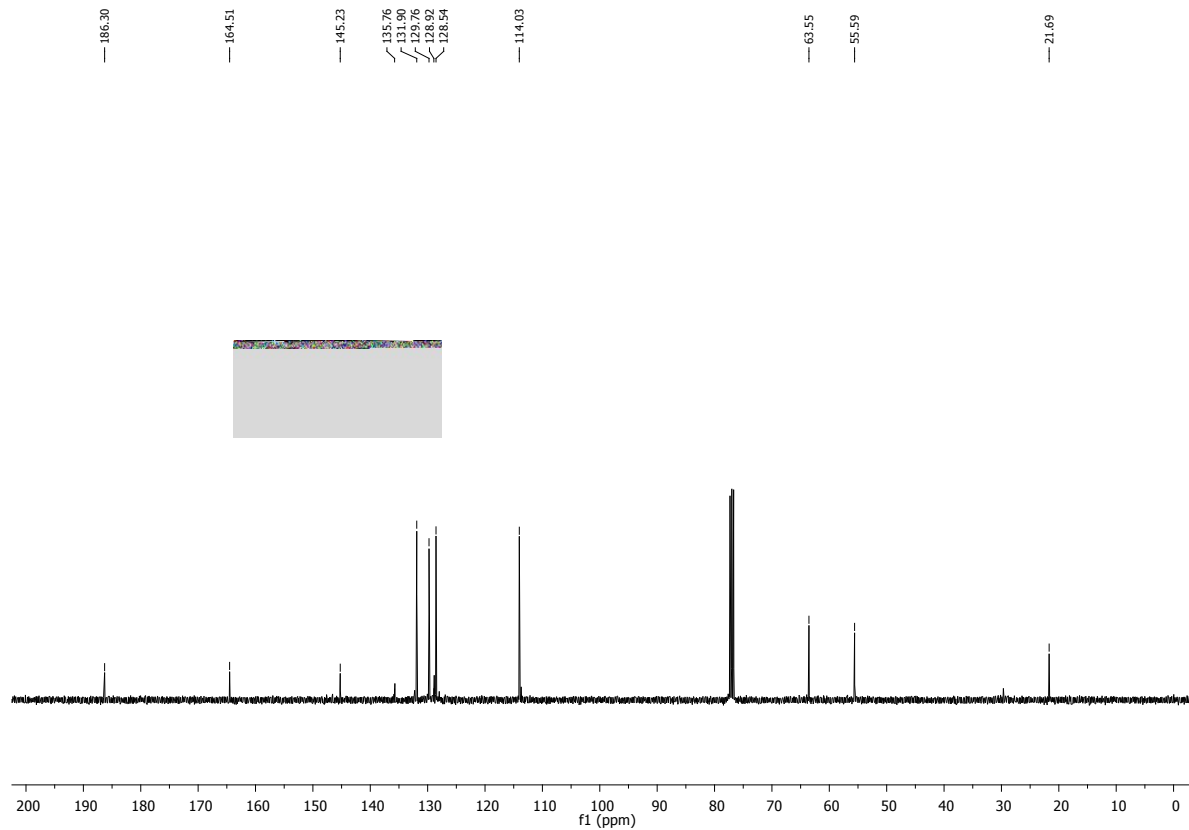

$^{13}\text{C}$  spectrum 3f

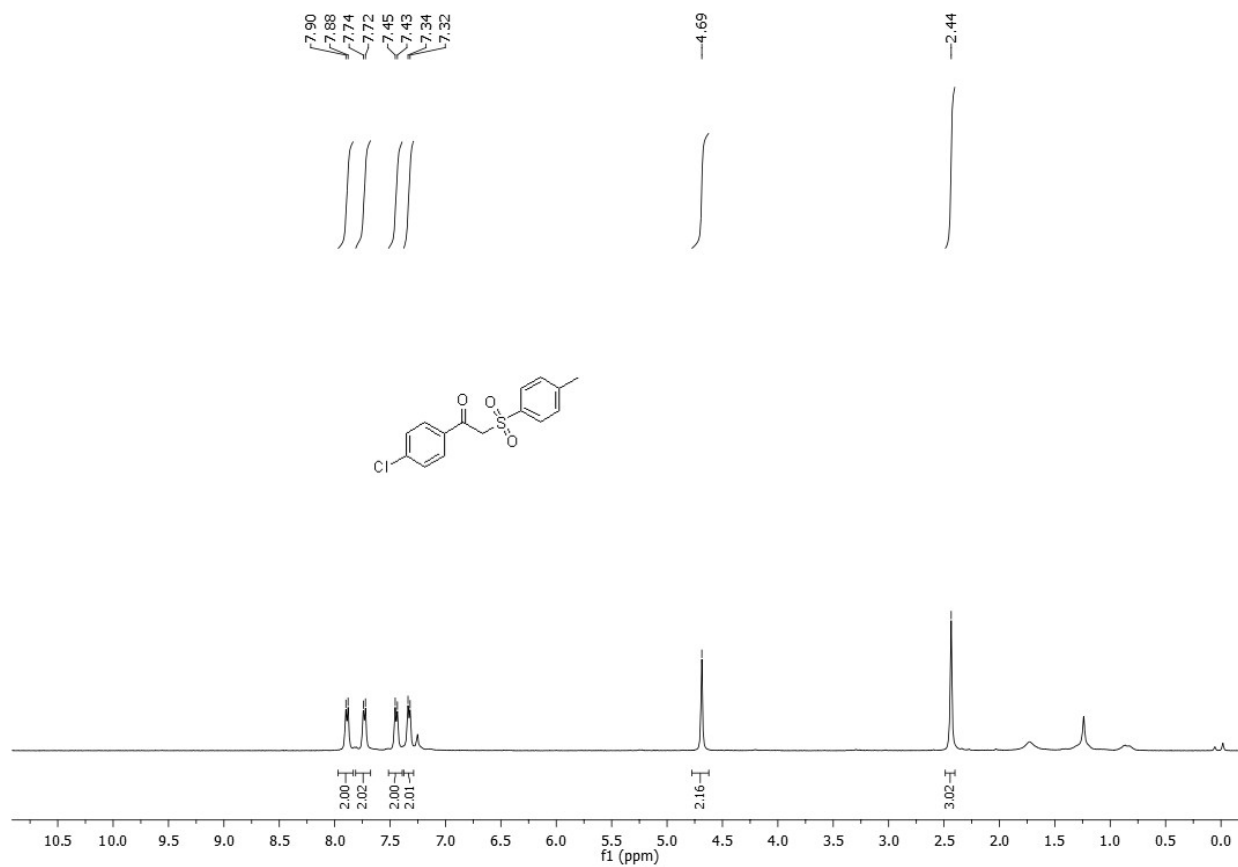

**<sup>1</sup>H spectrum 3g**

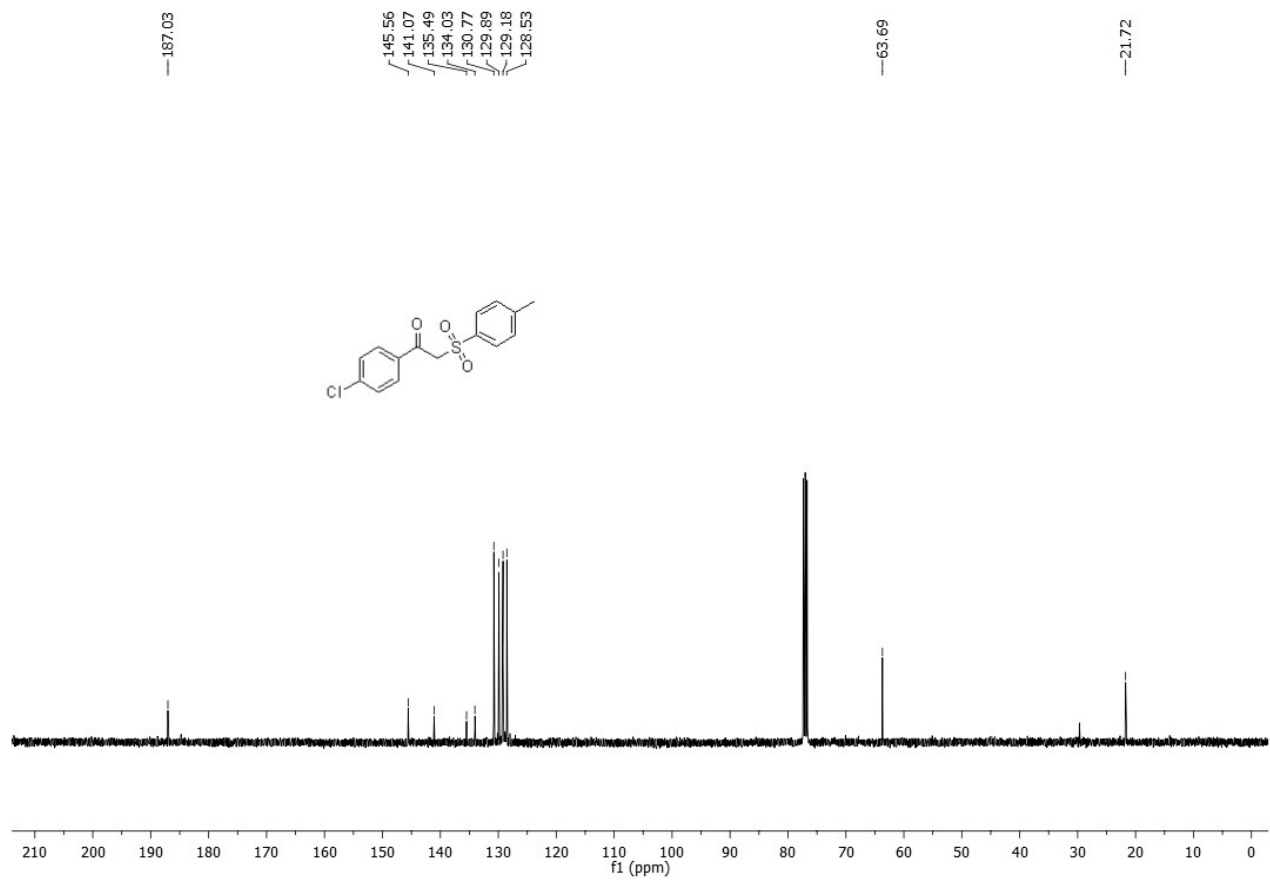

$^{13}\text{C}$  spectrum 3g

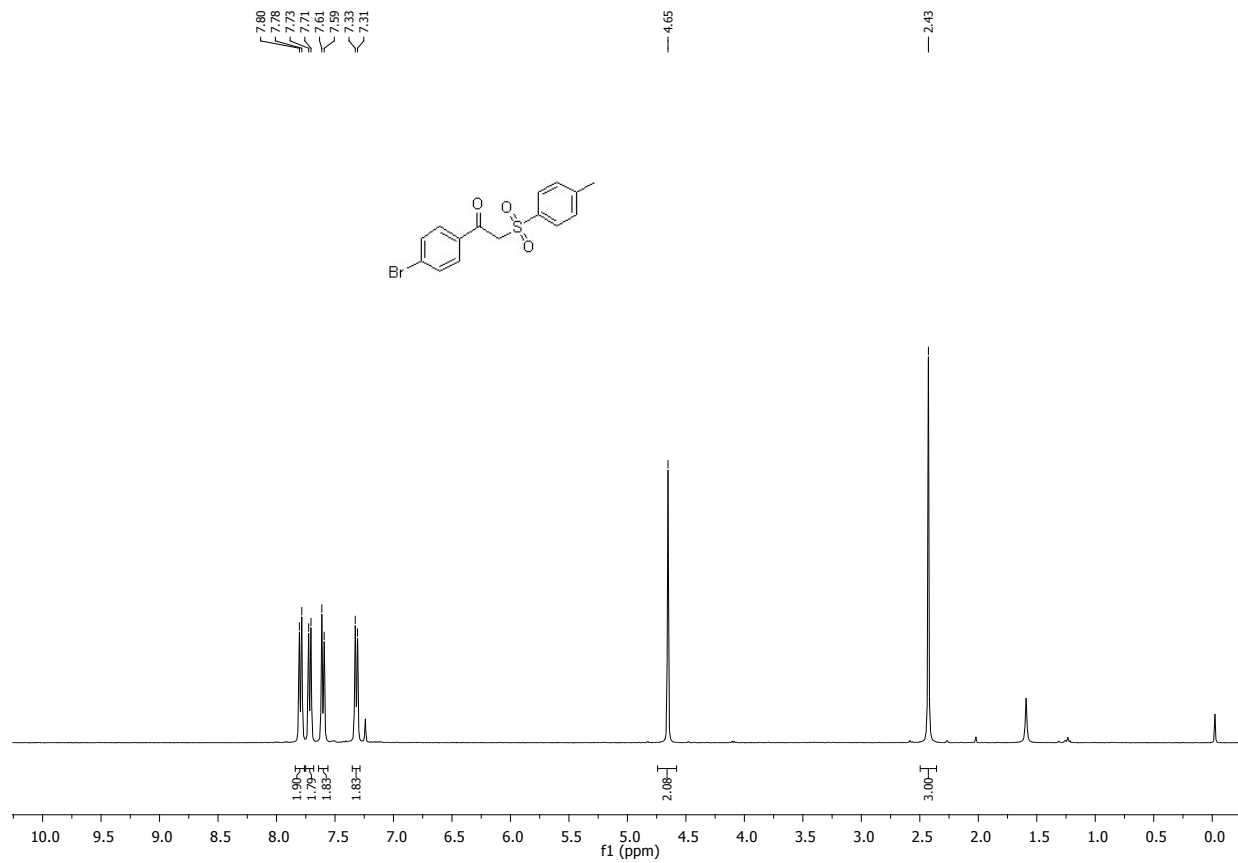

**<sup>1</sup>H spectrum 3h**



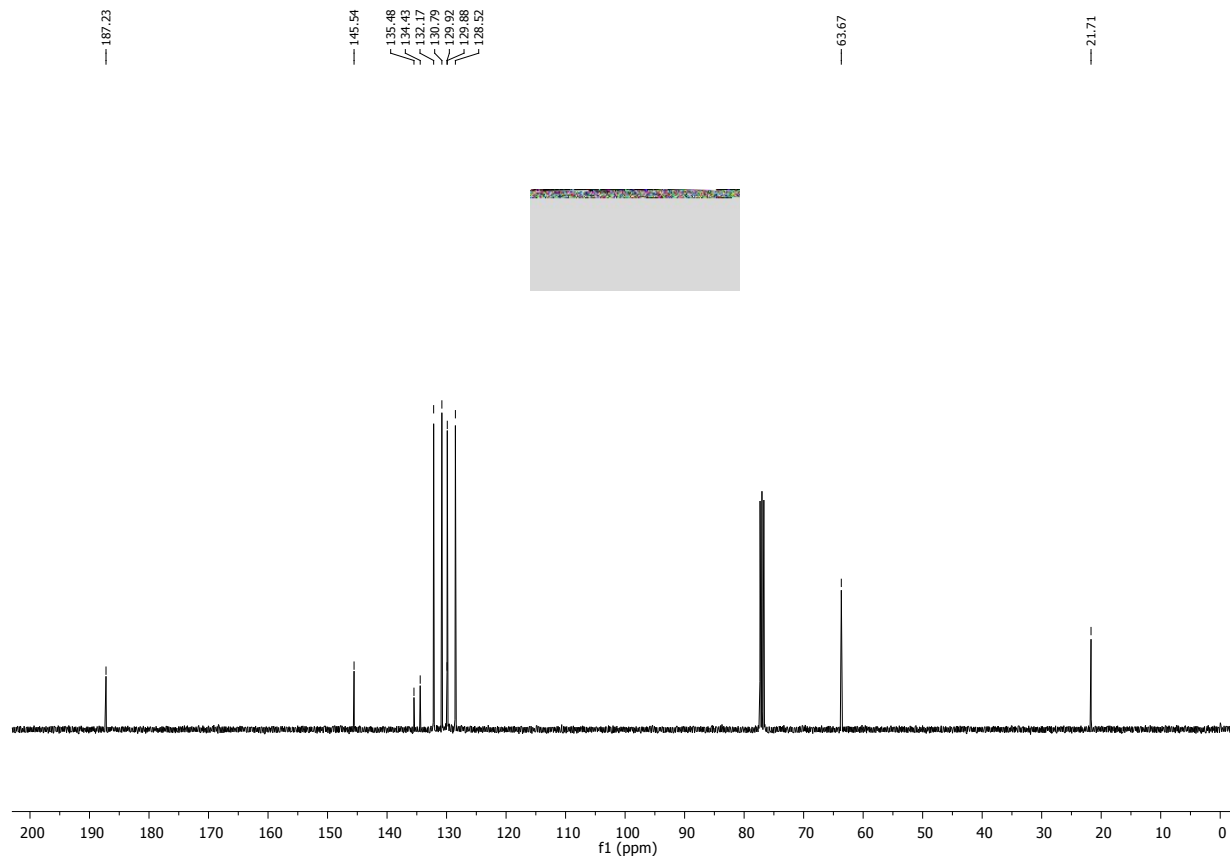

$^{13}\text{C}$  spectrum 3h

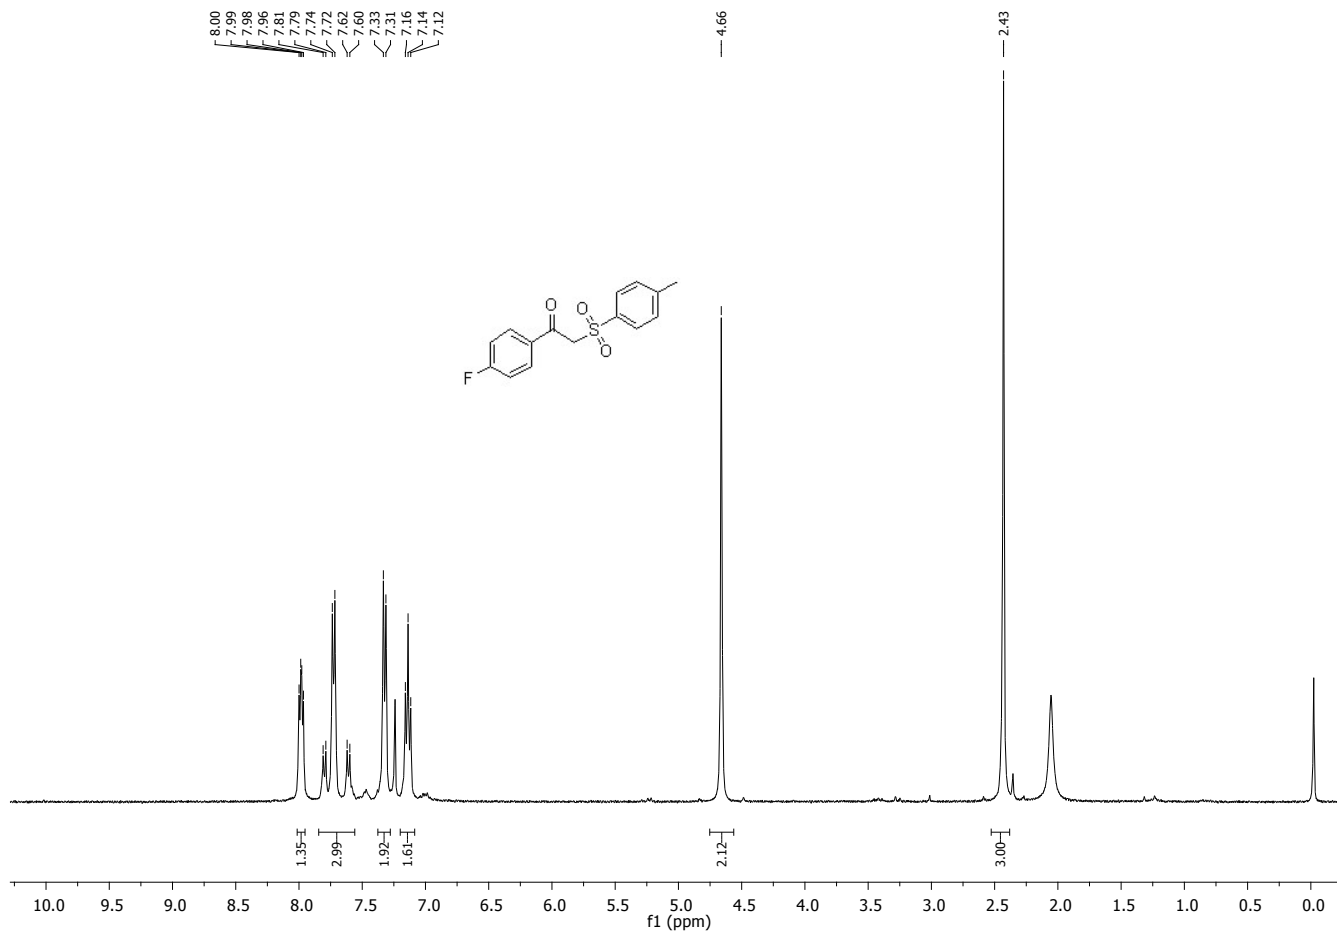

**<sup>1</sup>H spectrum 3i**

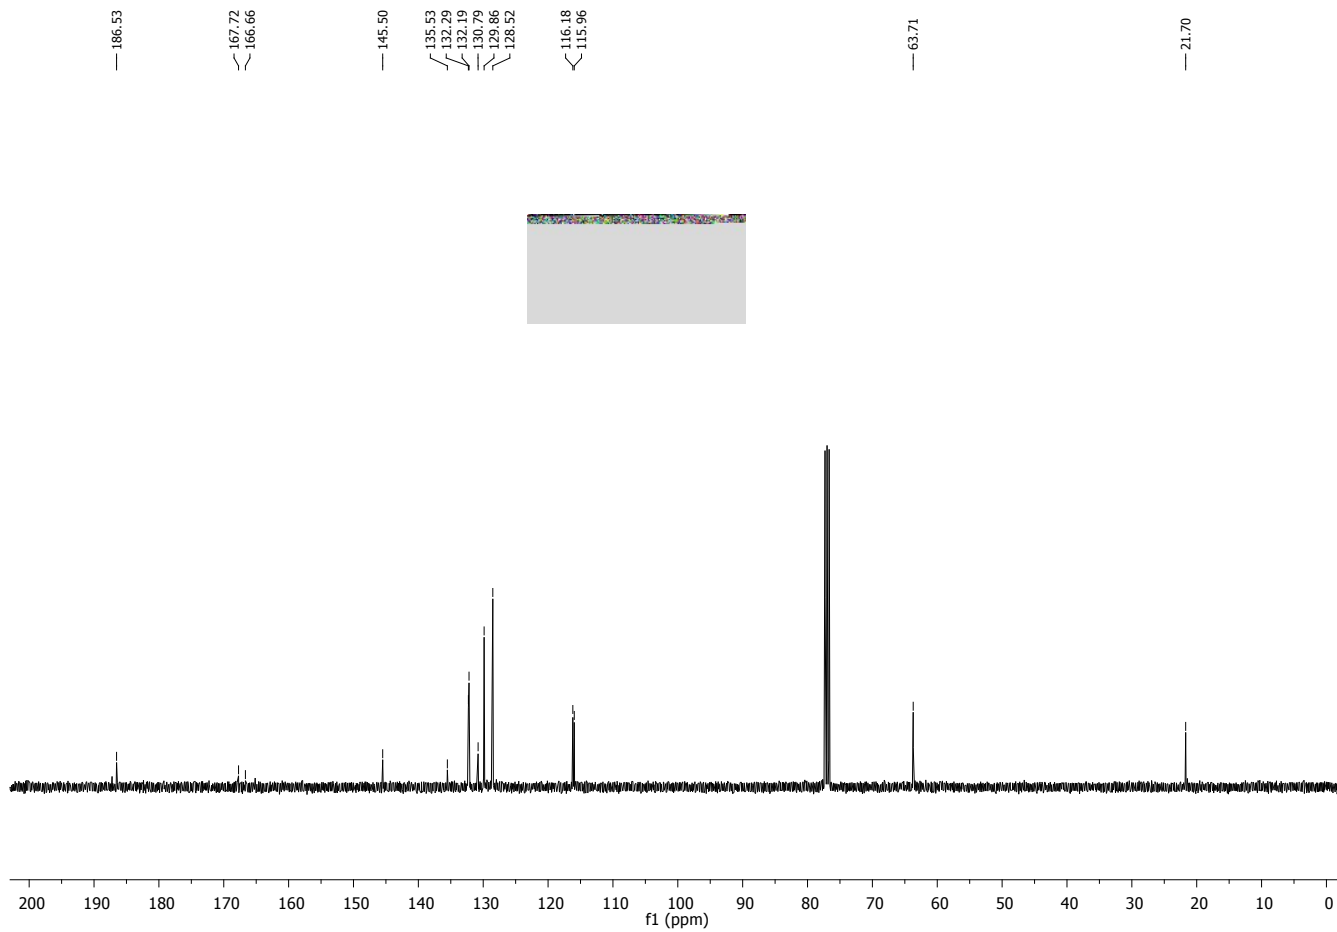

$^{13}\text{C}$  spectrum 3i

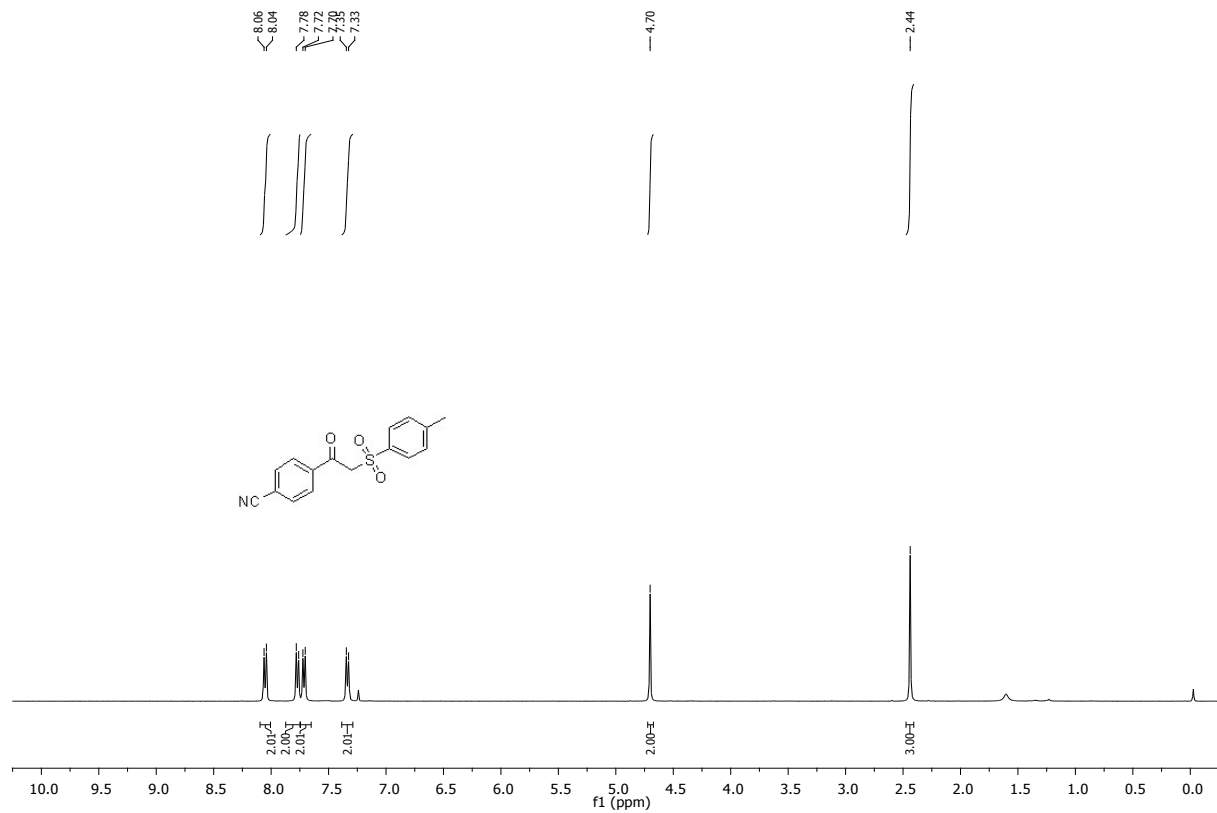

**<sup>1</sup>H spectrum 3j**

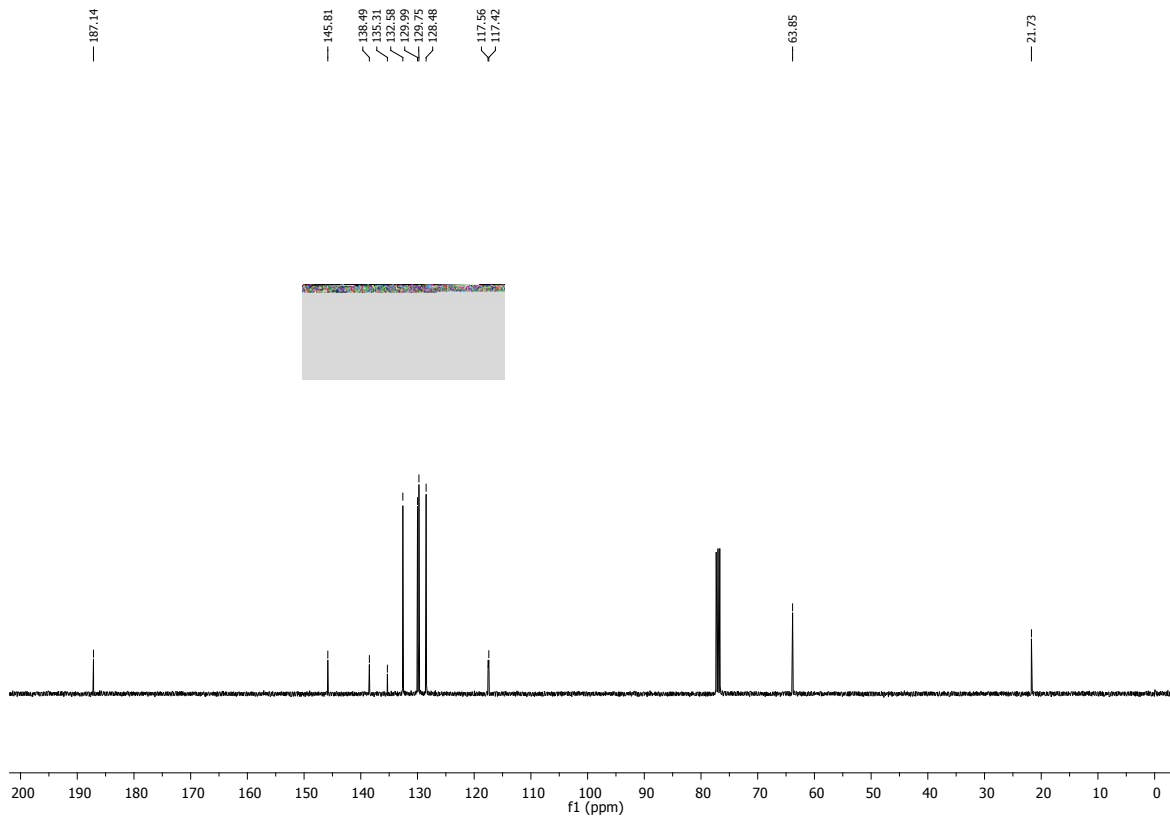

$^{13}\text{C}$  spectrum 3j

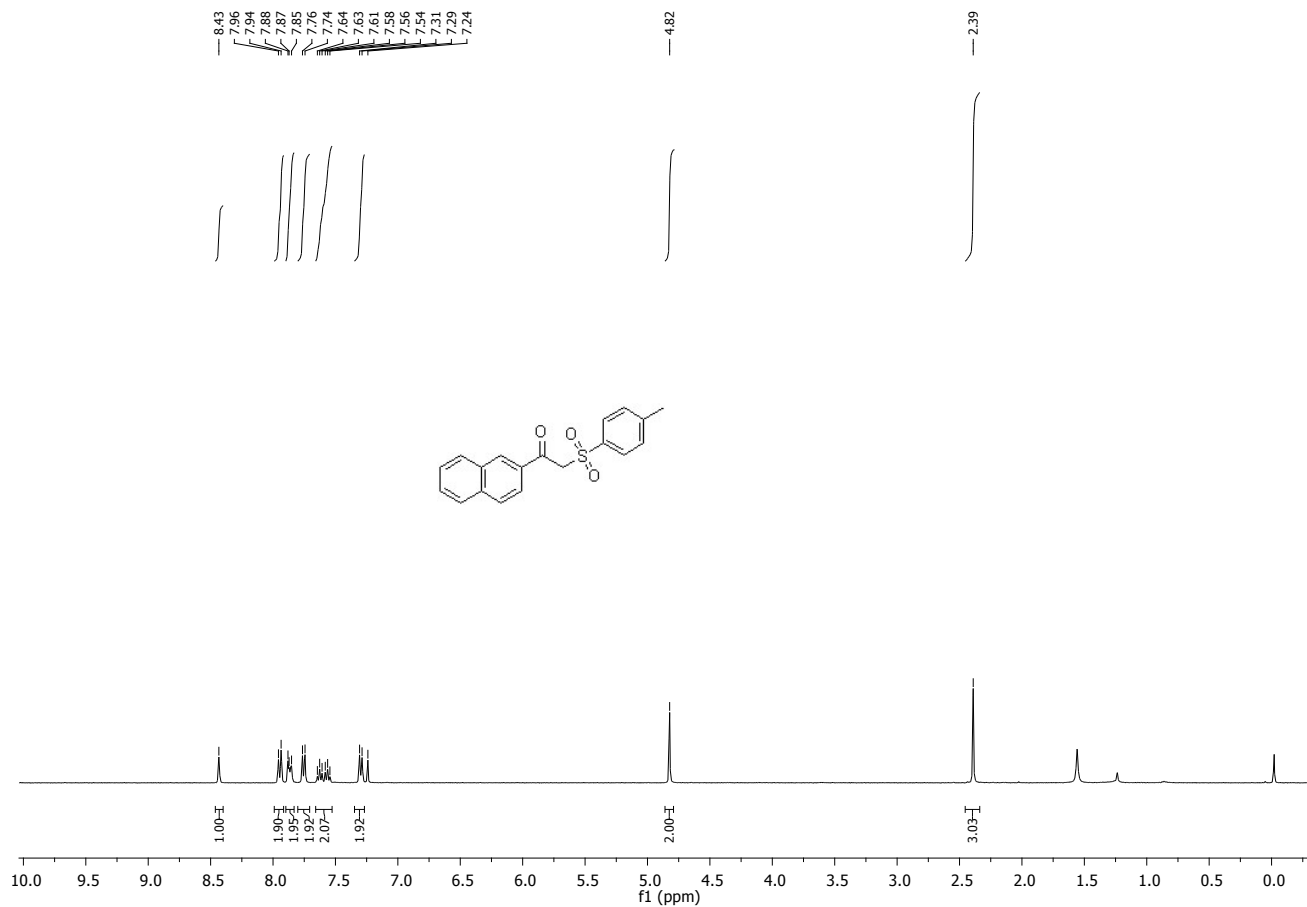

**<sup>1</sup>H spectrum 3k**

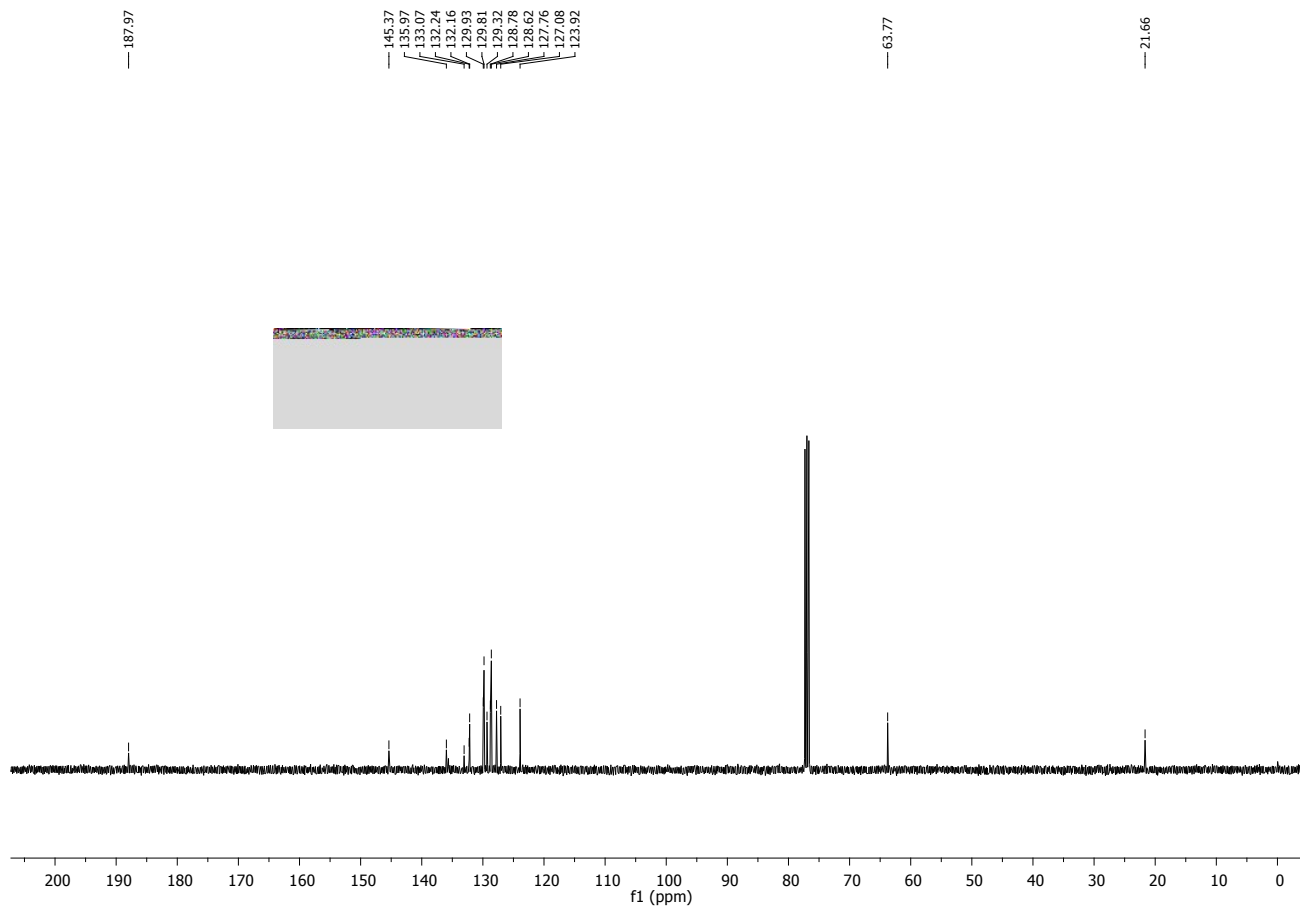

**<sup>13</sup>C spectrum 3k**

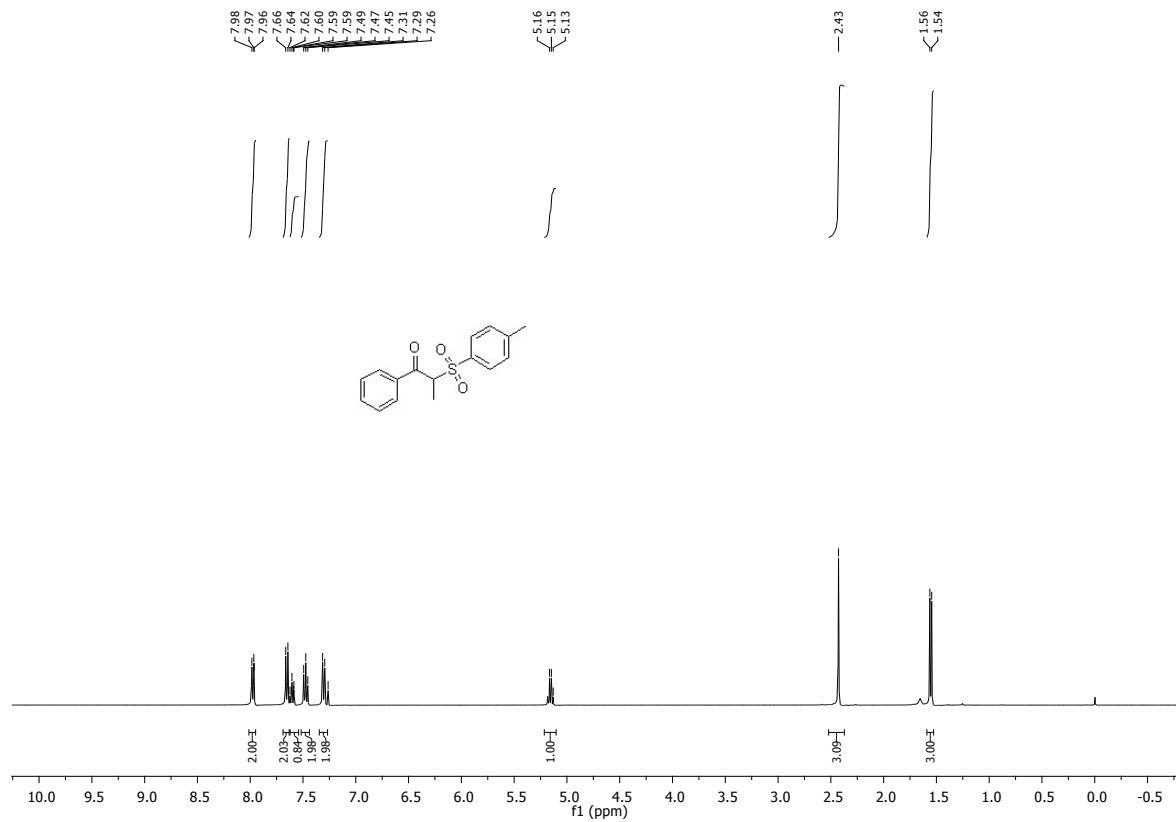

**<sup>1</sup>H spectrum 31**



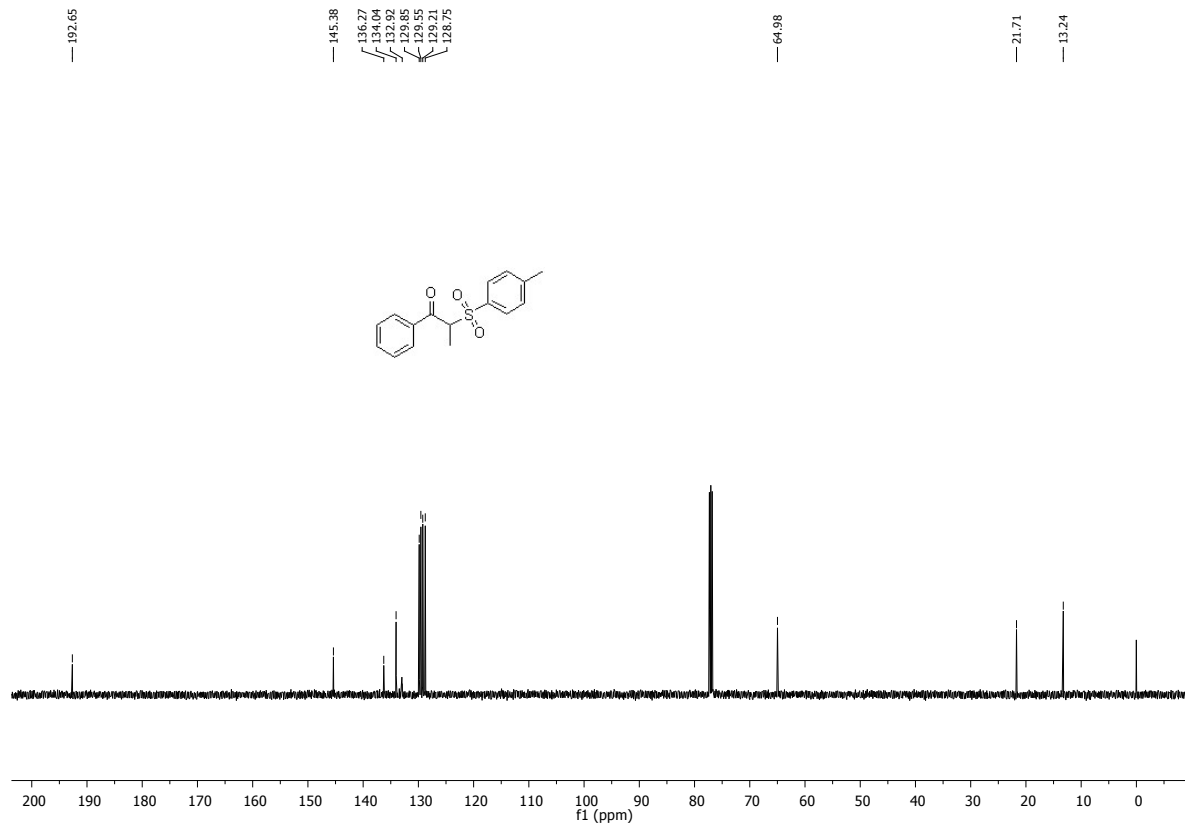

<sup>13</sup>C spectrum 3I

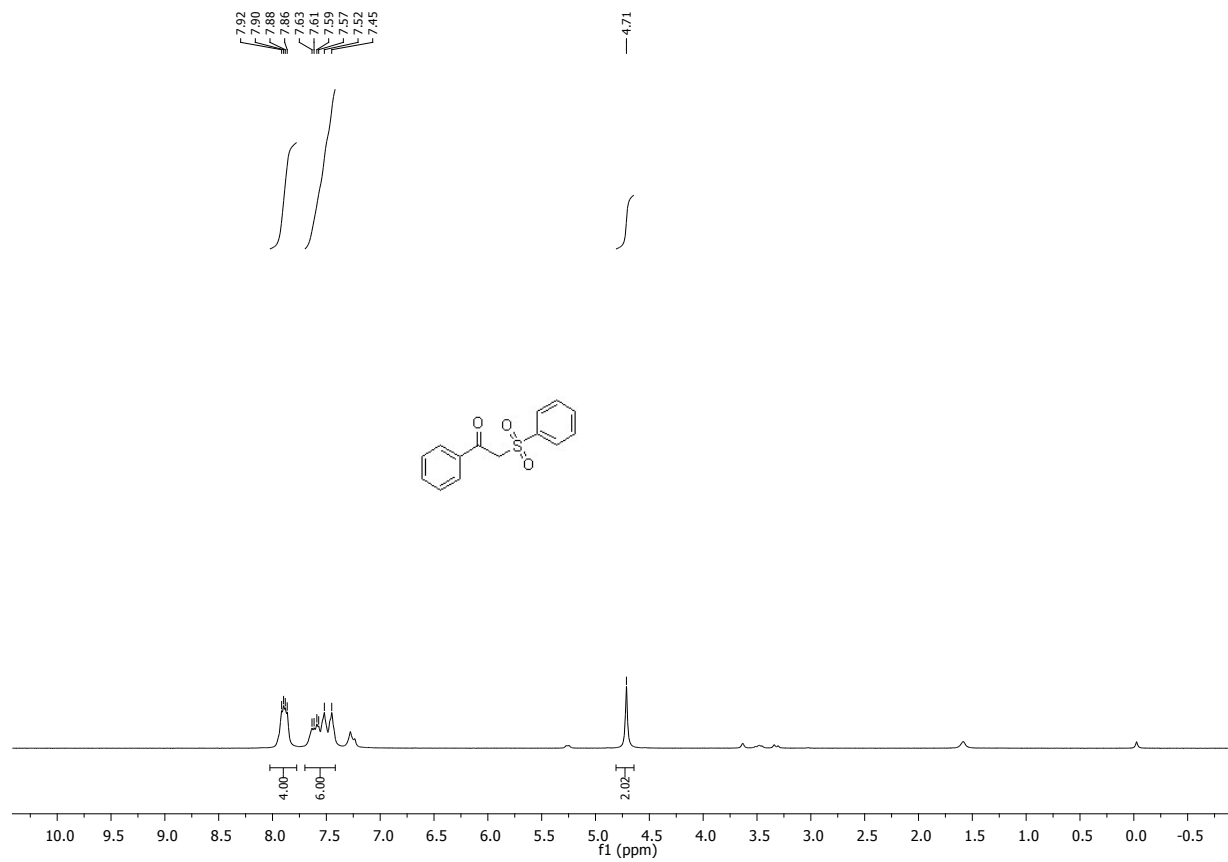

**<sup>1</sup>H spectrum 3m**

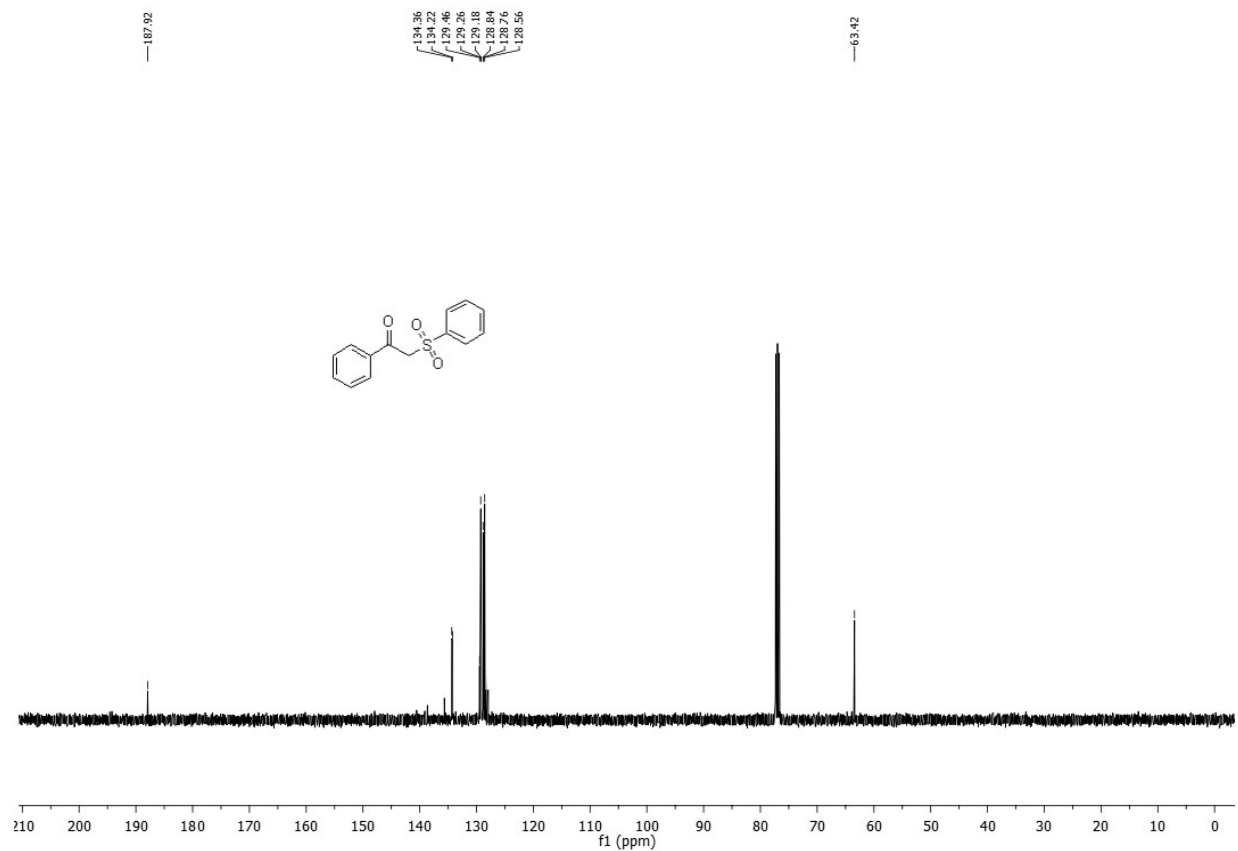

**<sup>13</sup>C spectrum 3m**

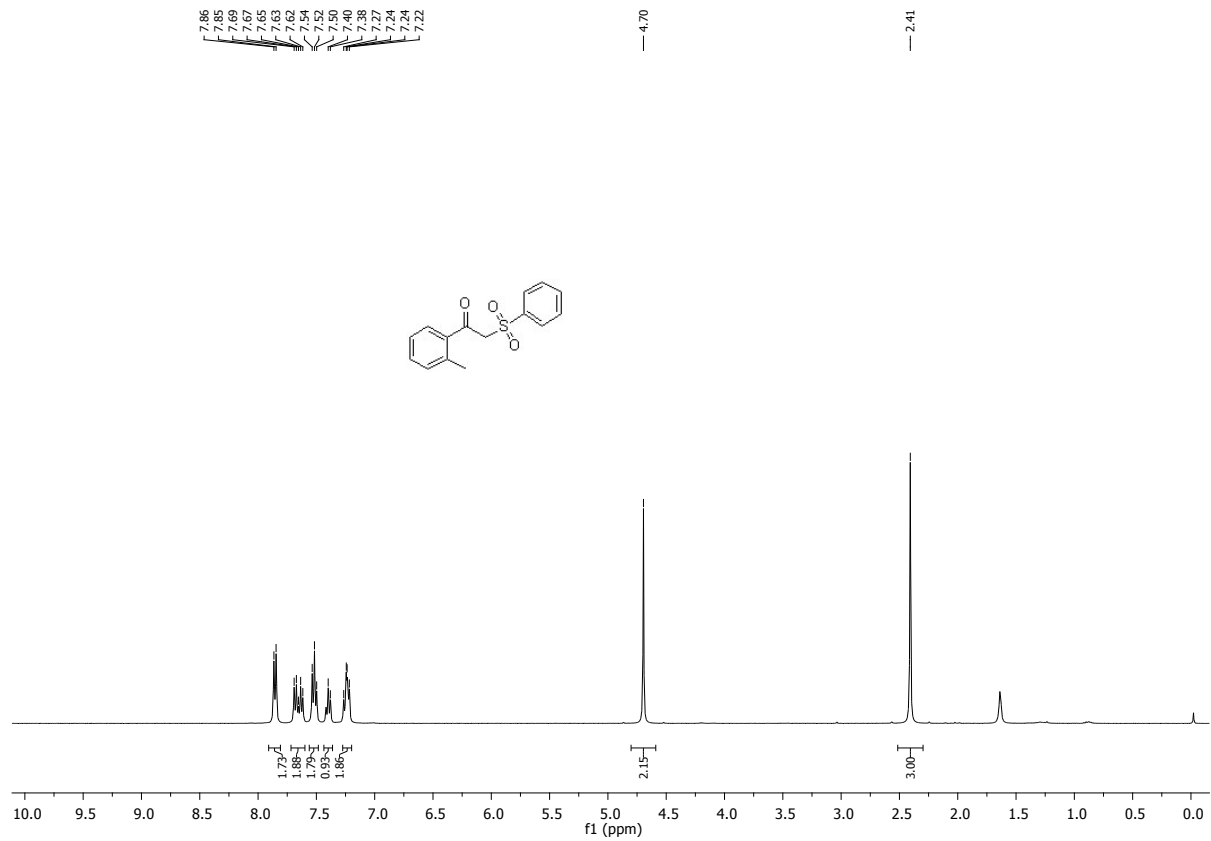

**<sup>1</sup>H spectrum 3n**

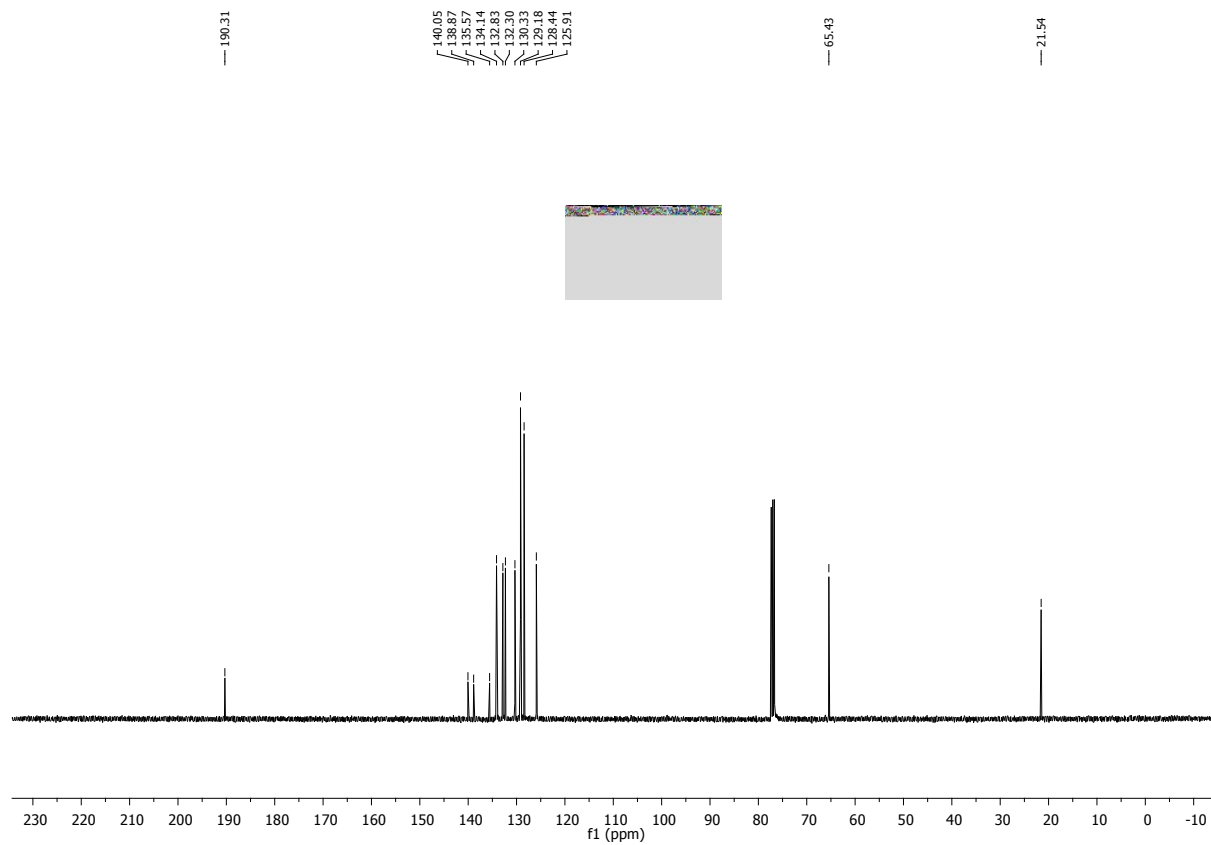

**<sup>13</sup>C spectrum 3n**

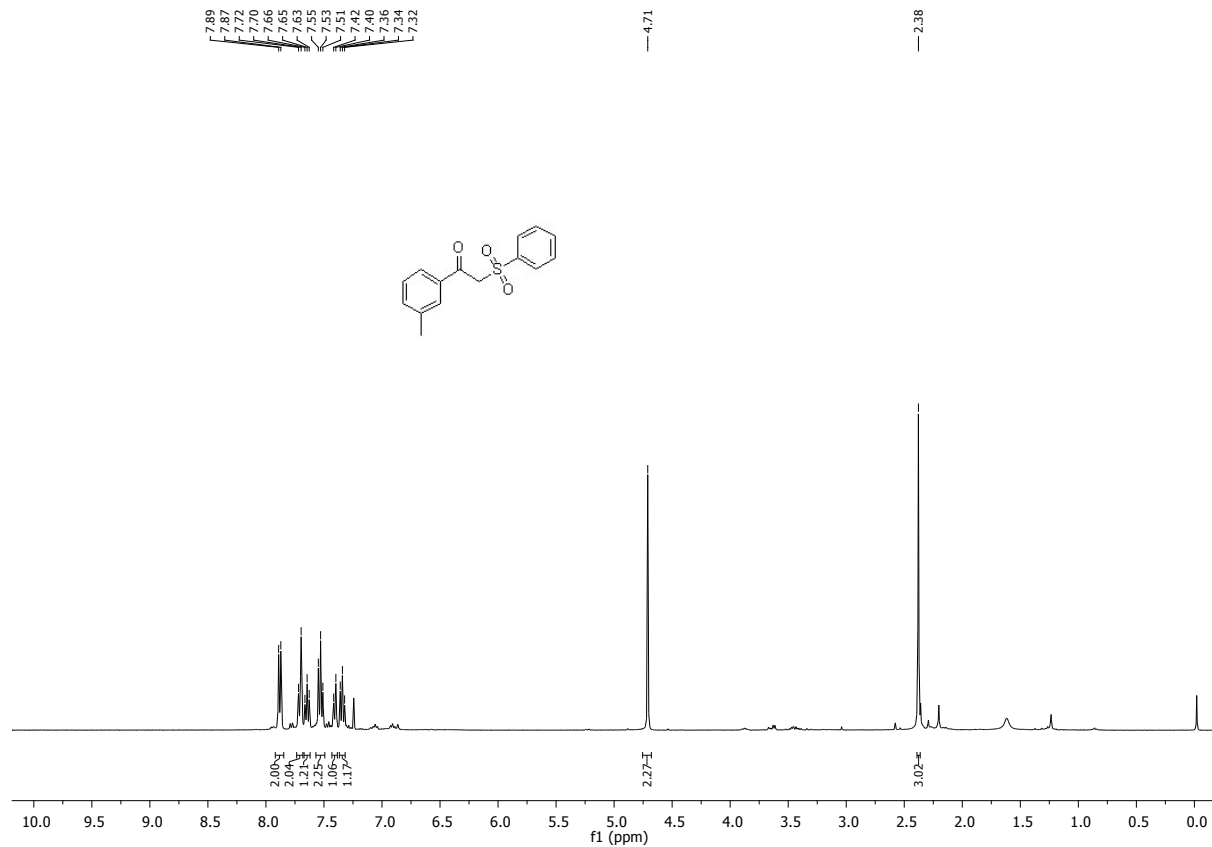

**<sup>1</sup>H spectrum 30**

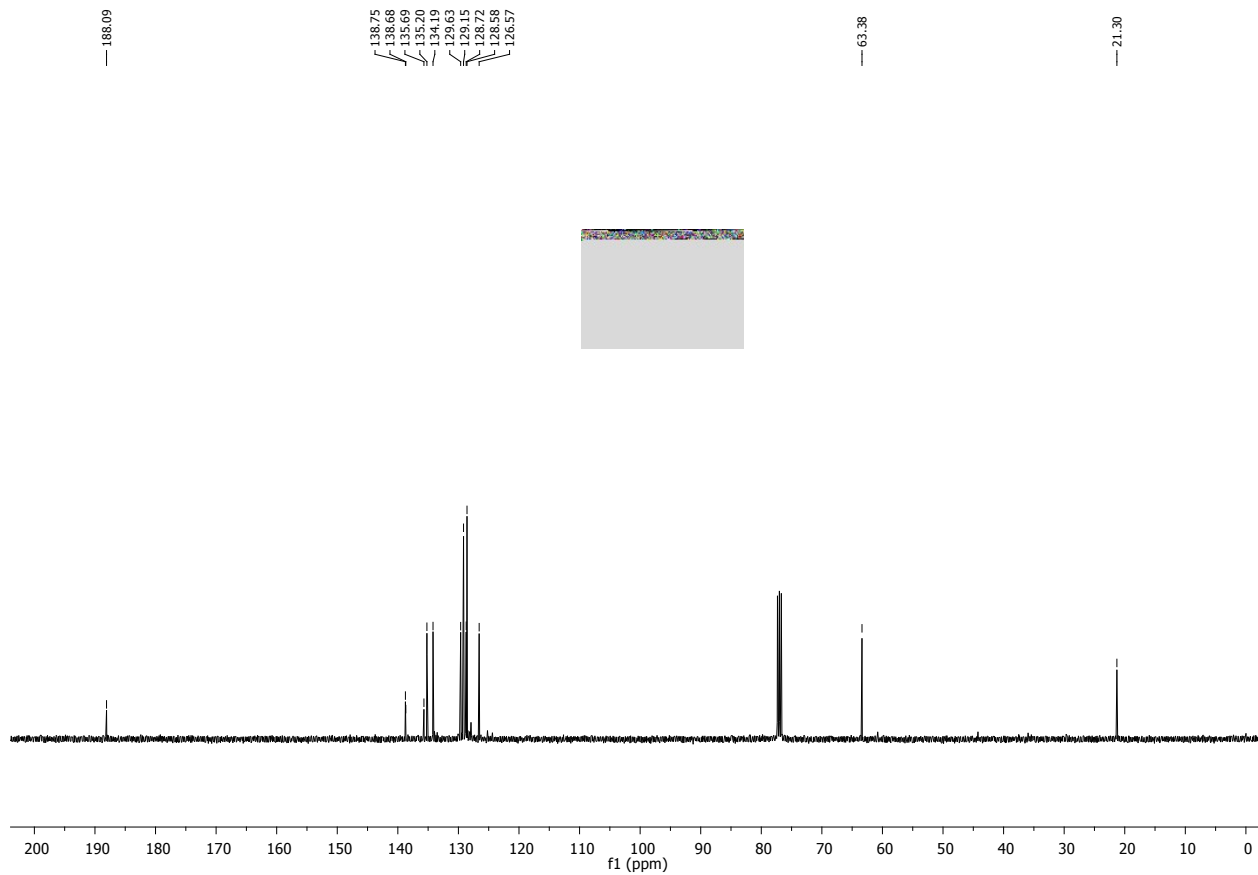

**<sup>13</sup>C spectrum 3o**

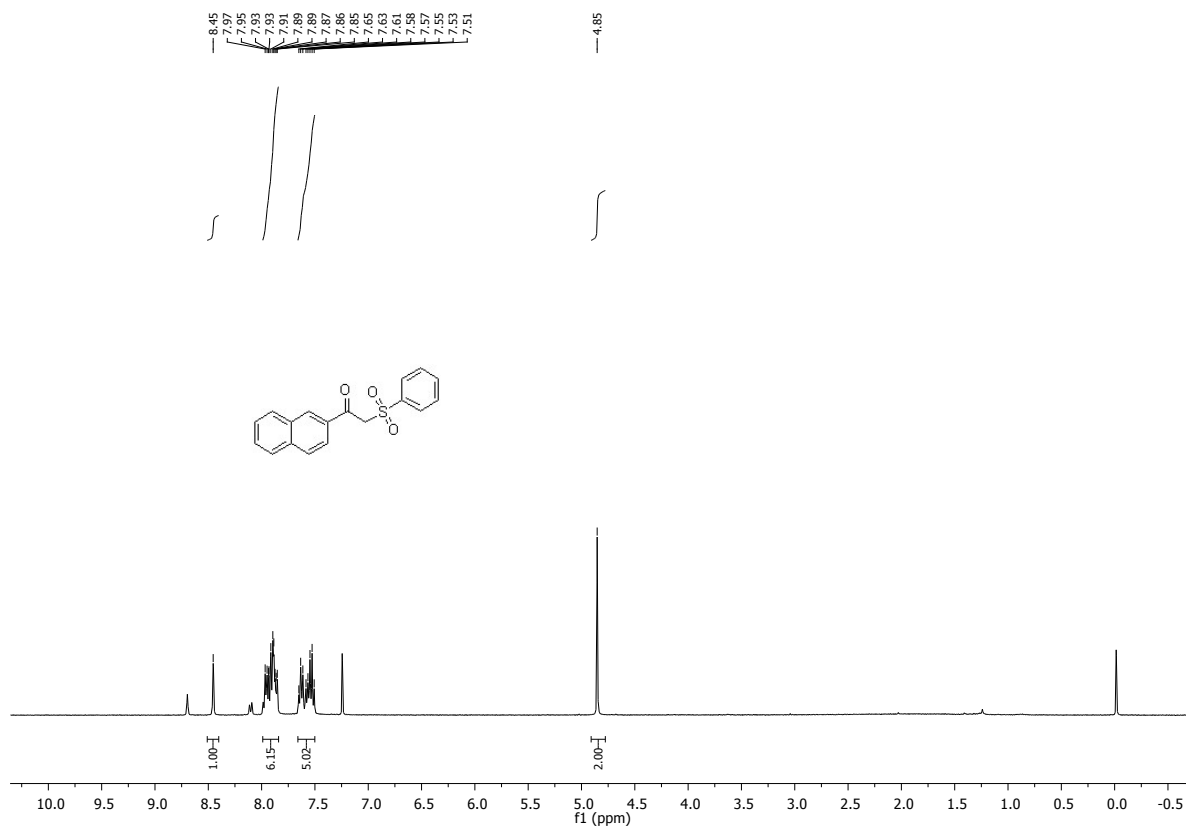

<sup>1</sup>H spectrum 3p



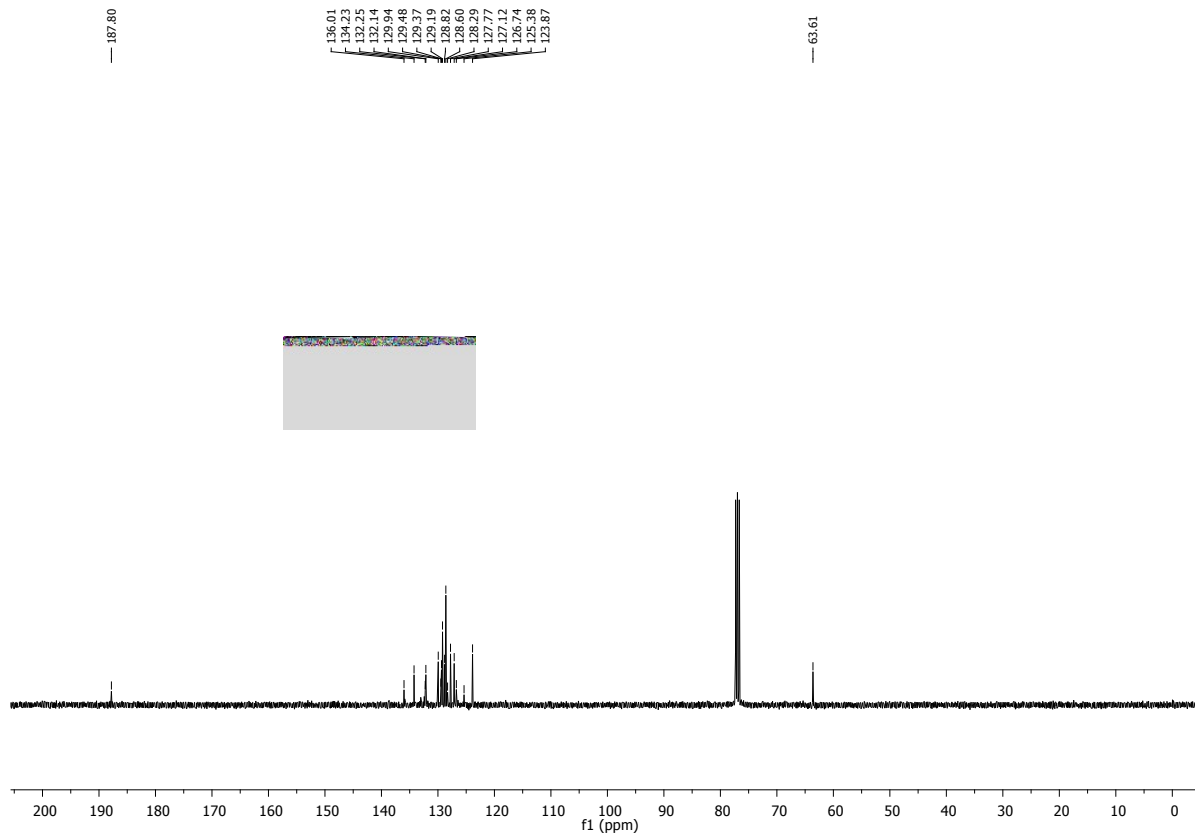

**$^{13}\text{C}$  spectrum 3p**

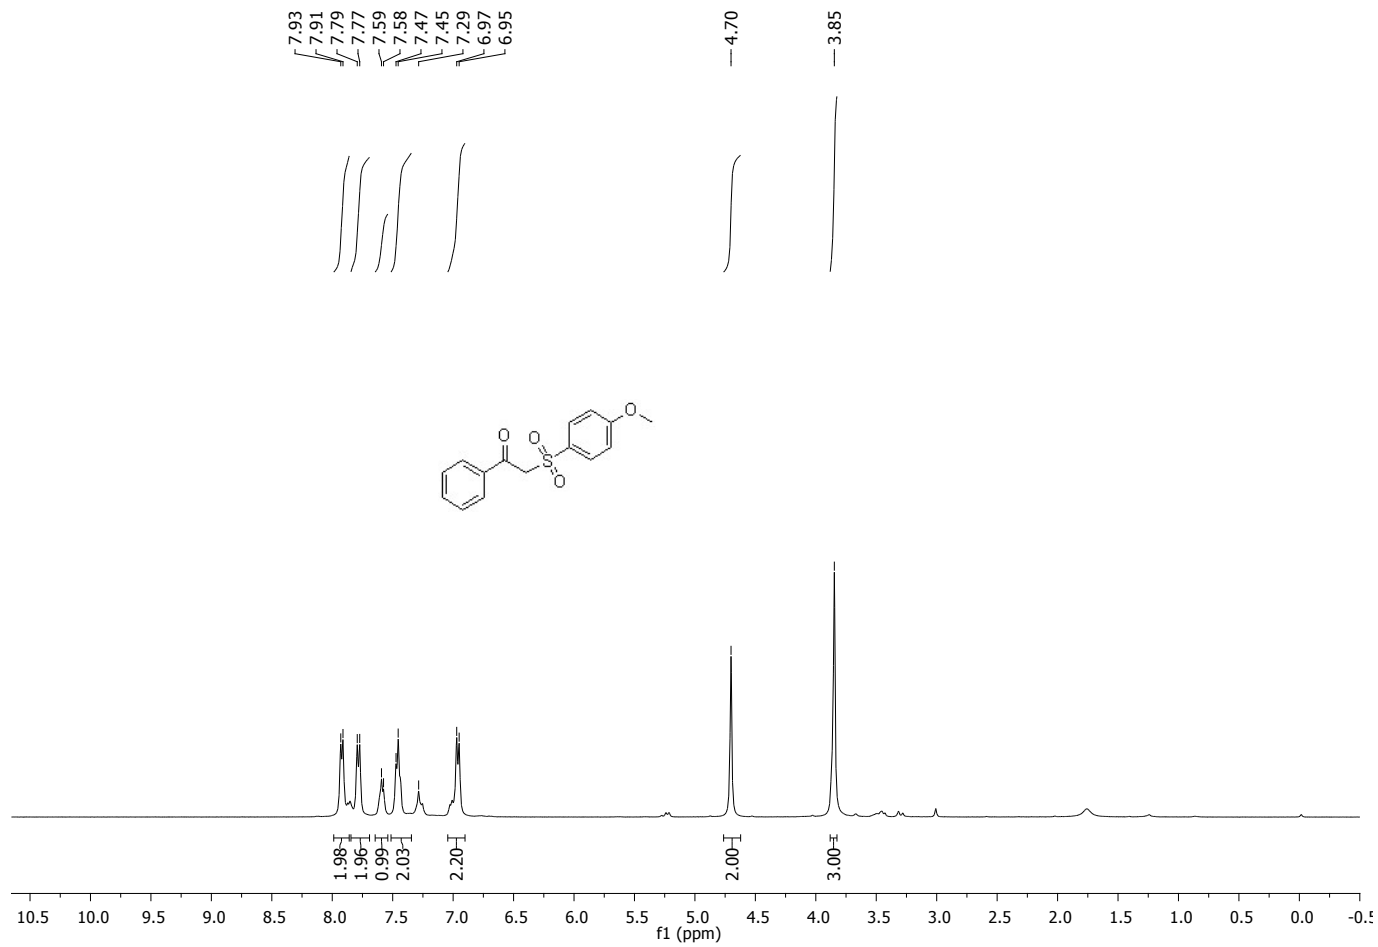

**<sup>1</sup>H spectrum 3q**

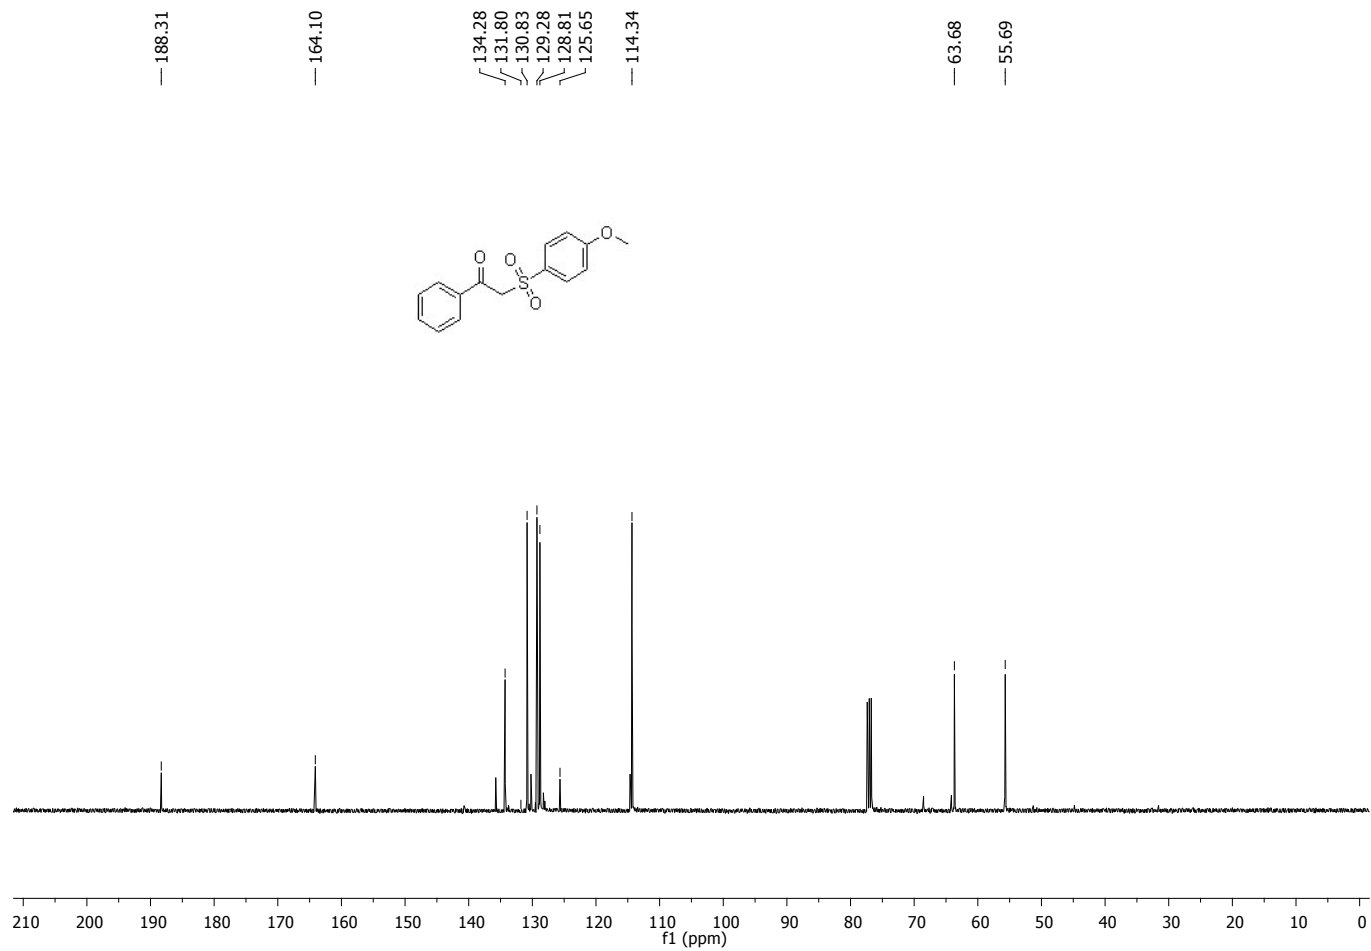

$^{13}\text{C}$  spectrum 3q

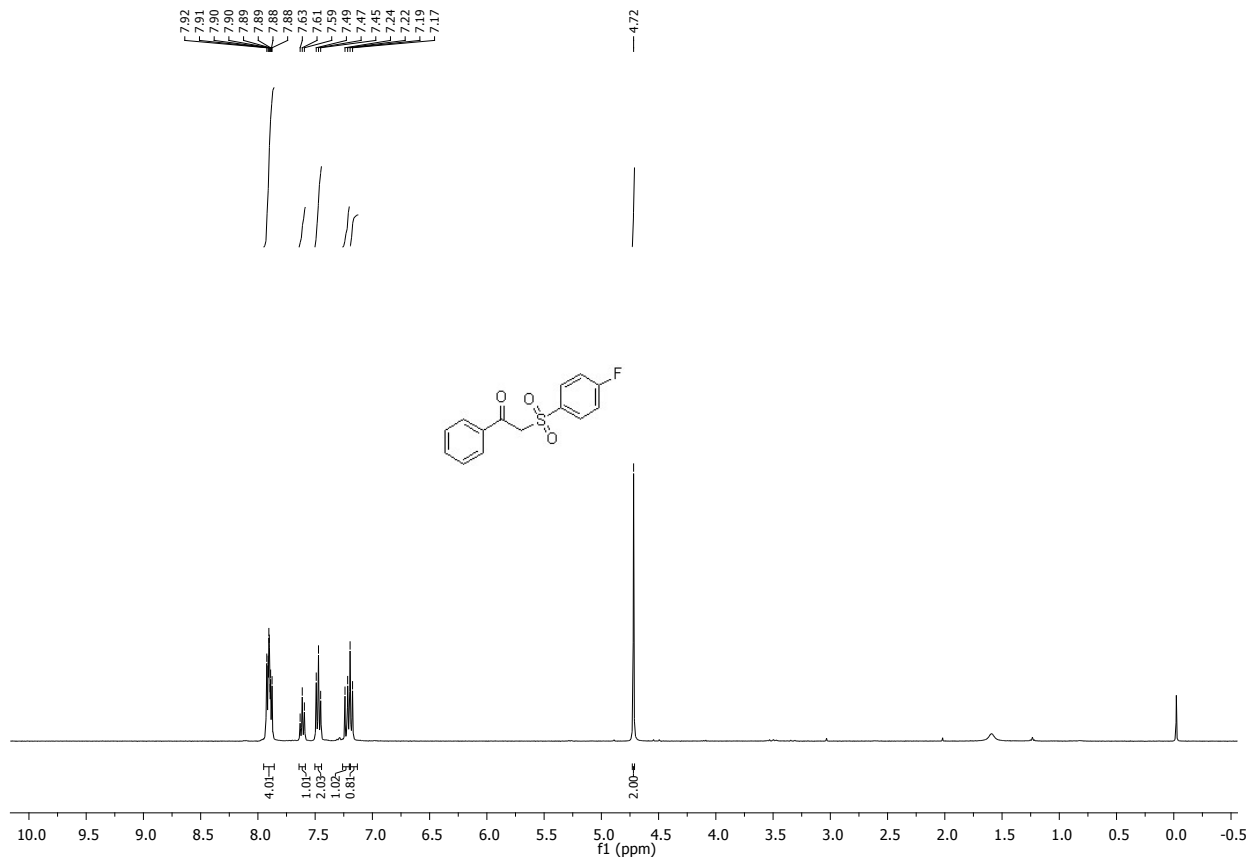

**<sup>1</sup>H spectrum 3r**

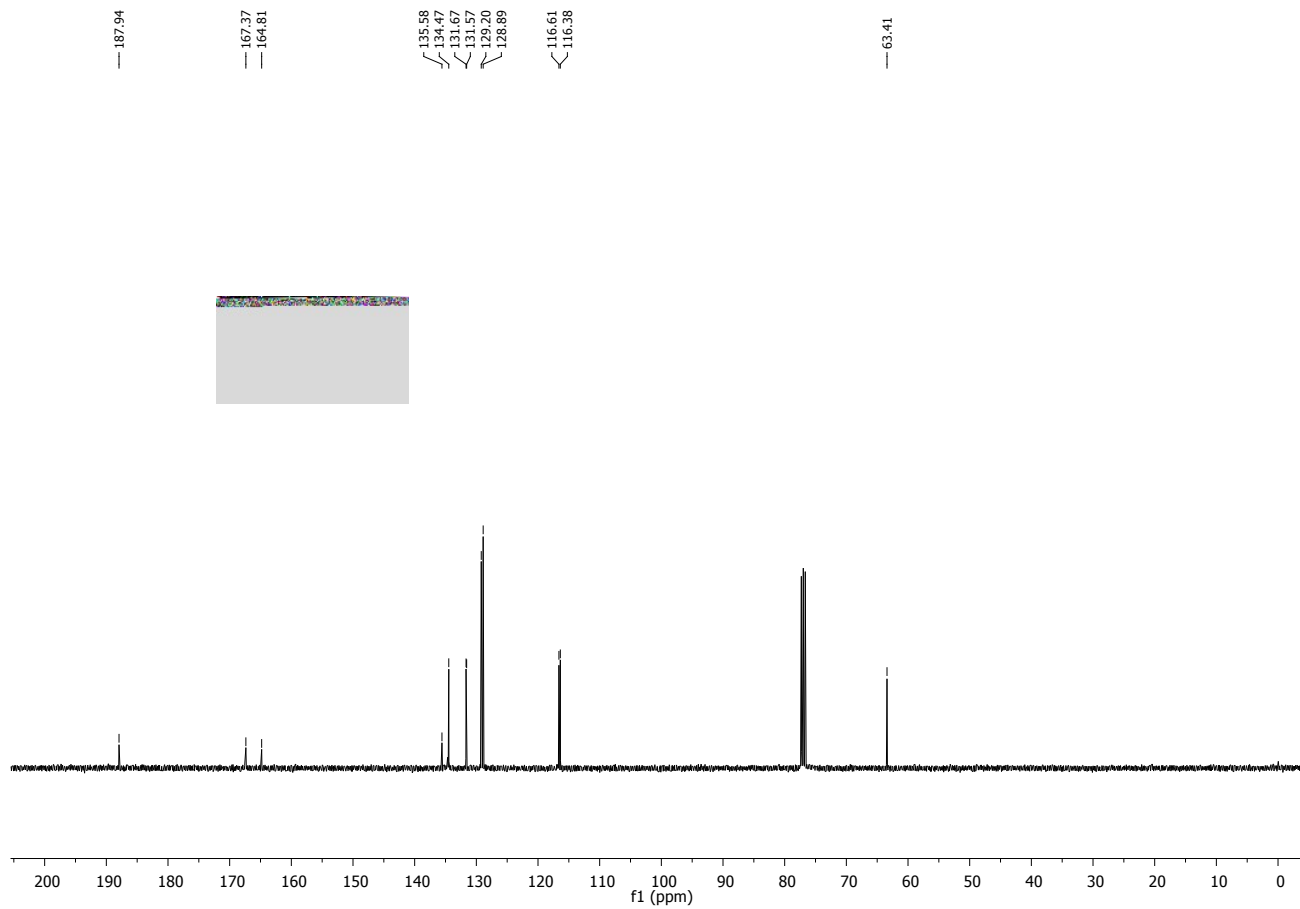

**<sup>13</sup>C spectrum 3r**

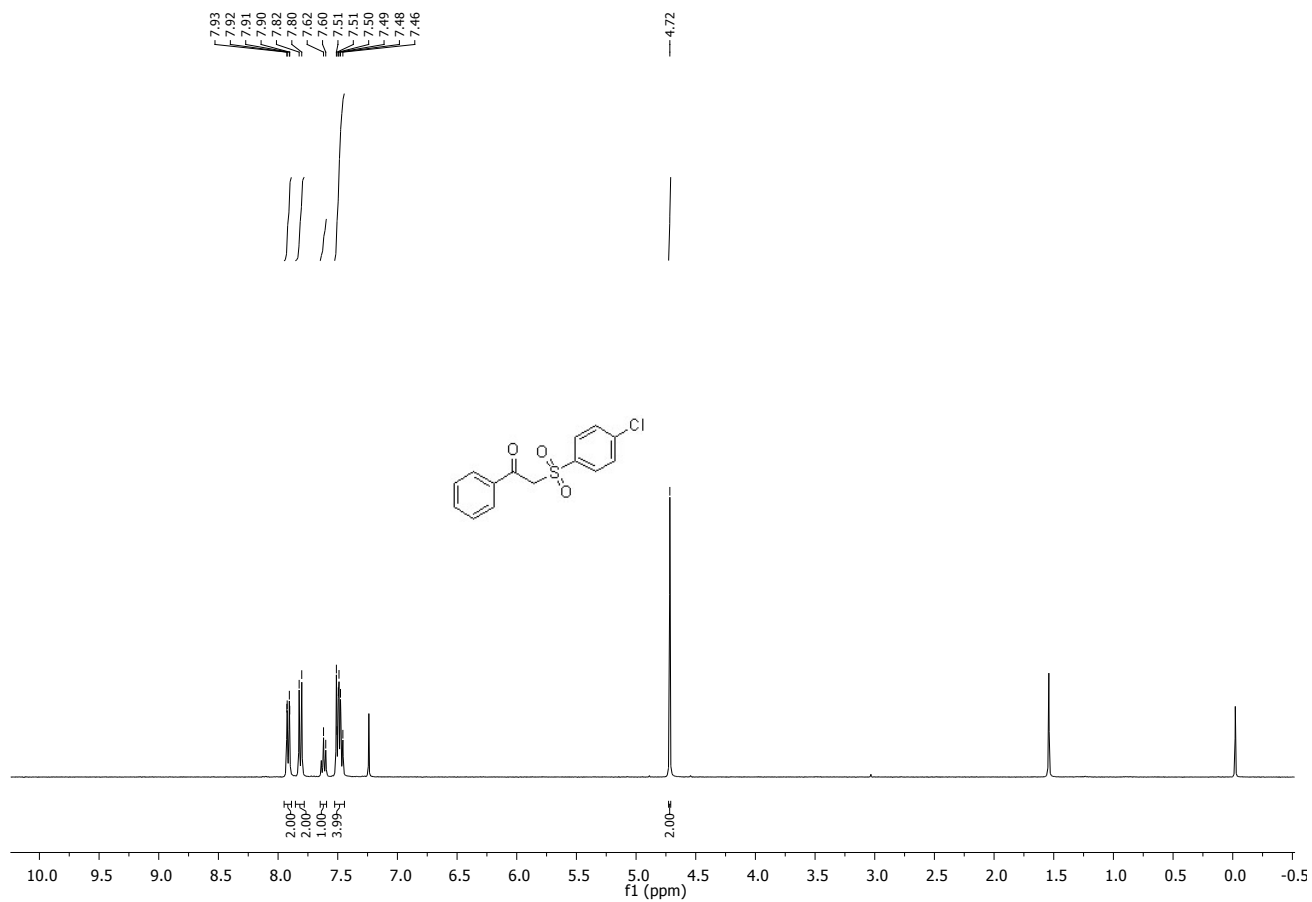

**<sup>1</sup>H spectrum 3s**

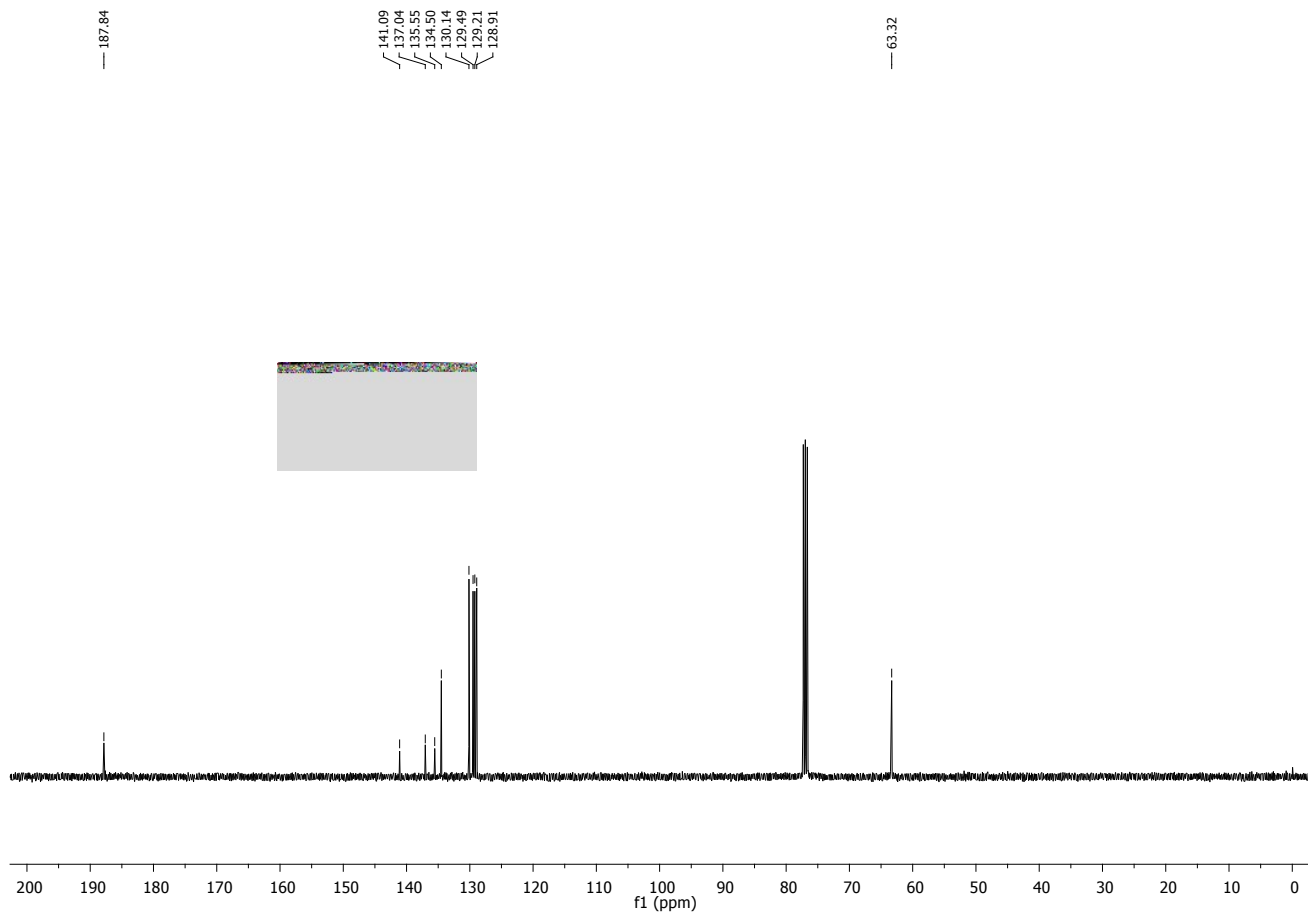

<sup>13</sup>C spectrum 3s

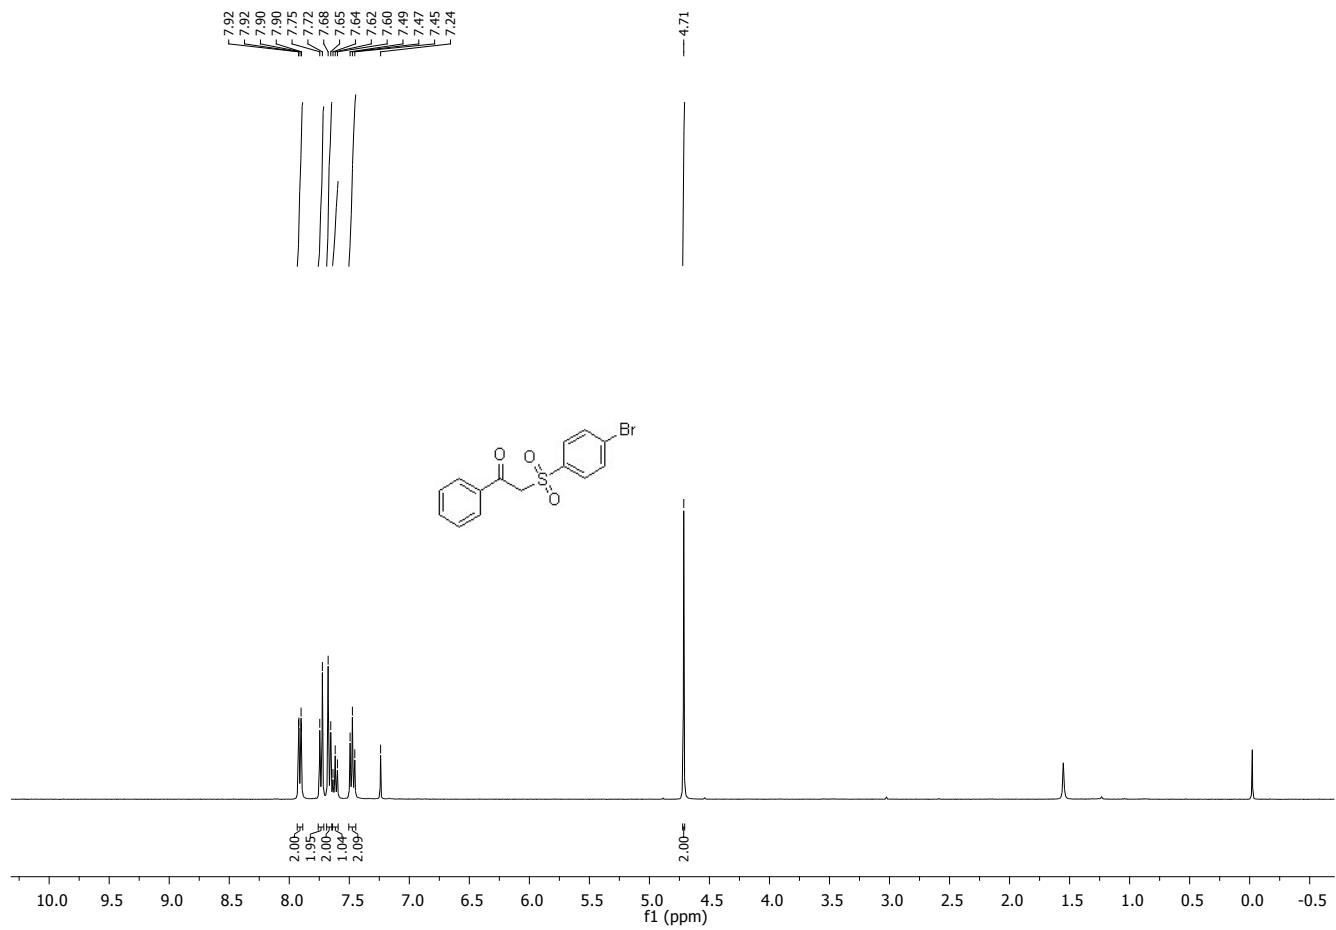

**<sup>1</sup>H spectrum 3t**



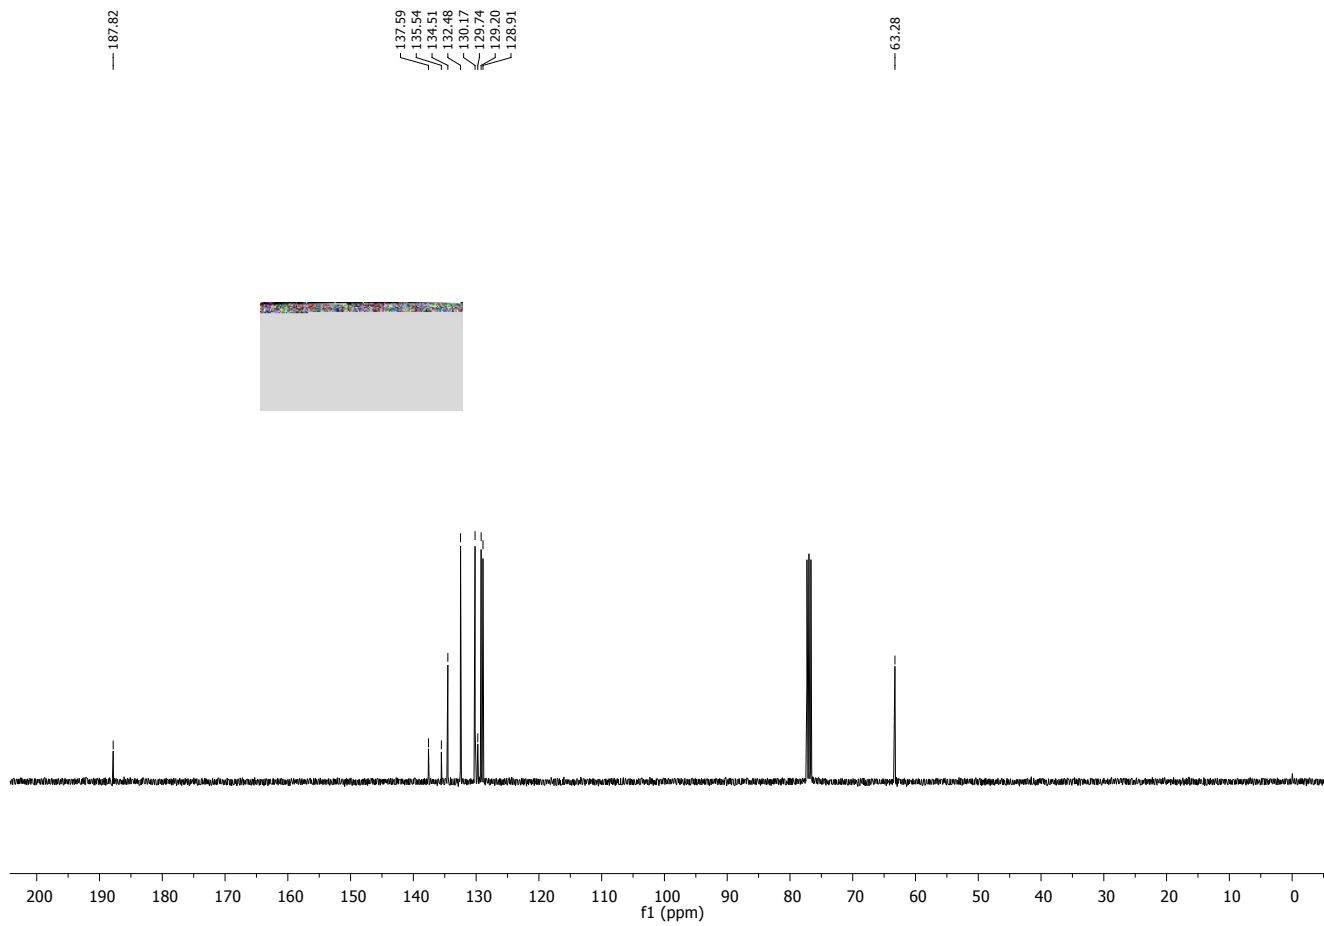

**$^{13}\text{C}$  spectrum 3t**

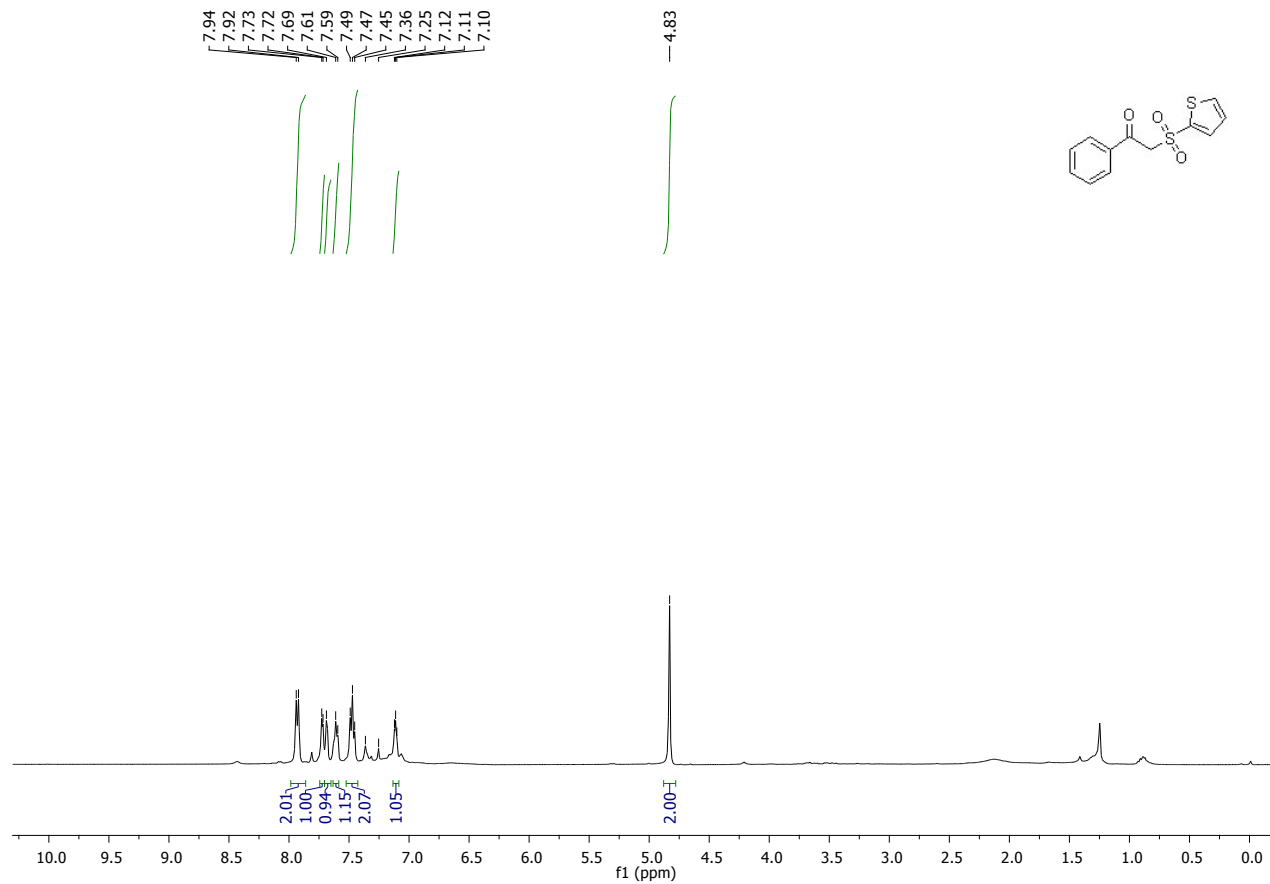

**<sup>1</sup>H spectrum 3u**

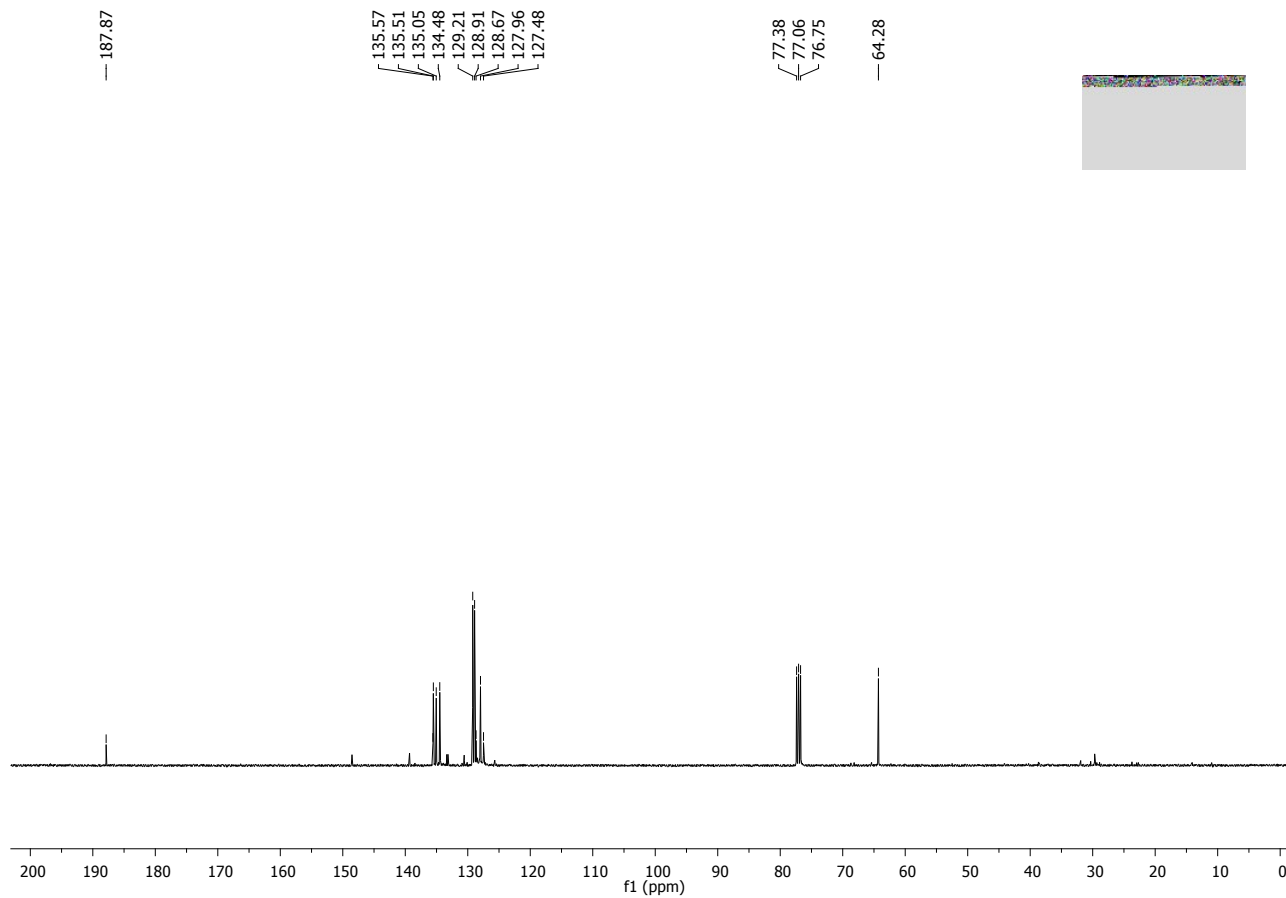

**$^{13}\text{C}$  spectrum 3u**
